# Supplementary material for: The Dynamics of Flower Development in Castanea sativa Mill.
Source: MDPI journal article supplement (doi:10.3390/plants10081538), 2021-07-27
Supplement: s1 [file s1]

**Table S1.** *De novo* assembly statistics of *Castanea sativa* transcriptome before (Contigs) and after redundancy removal (Transcripts).

| Transcriptome assembly metrics                                 |             |
|----------------------------------------------------------------|-------------|
| Total number of raw reads                                      | 193 896 450 |
| Total number of reads after trimming                           | 134 286 842 |
| Number of contigs in <i>de novo</i> transcriptome assembly     | 164 926     |
| Number of transcripts in <i>de novo</i> transcriptome assembly | 32 871      |
| Average length of the transcripts                              | 906.25      |
| N50                                                            | 1 230       |
| GC %                                                           | 44          |

**Table S2** – *Castanea sativa* transcriptome completeness as determined by Benchmarking Universal Single-Copy Orthologous (BUSCO)

| BUSCO notation       | BUSCOs |
|----------------------|--------|
| Complete Single-Copy | 86.67% |
| Complete Duplicated  | 7.45%  |
| Fragmented           | 3.53%  |
| Missing              | 2.35%  |

**Table S3** – List of gene accessions

| <b>A-Class</b>    |                                                |
|-------------------|------------------------------------------------|
| <b>Given name</b> | <b>Protein name</b>                            |
| AtAP1             | CAA78909.1                                     |
| OsAP1             | XP_015631033                                   |
| PpAP1             | XP_007223821.1                                 |
| VvAP1             | AAT07447.1                                     |
| PtAP1             | AAT39554.1                                     |
| QsAP1             | XP_023910685.1                                 |
| MdAP1             | ABG85297.1                                     |
| SlAP1             | NP_001234665.1                                 |
| CmAP1             | Cm_g17297.t1                                   |
| BpAP1             | CAA67967.1                                     |
| CuAP1             | A0A2H5NVU3_CITUN                               |
| CaAP1             | Corav.3359                                     |
| CsAP1             | XP_011650331.1                                 |
| AtrAP1.1          | XP_006856356.1                                 |
| AtrAP1.2          | XP_020530401.1                                 |
| PrAP1             | AAB58907.1                                     |
| FcAP1             | BAP28174.1                                     |
| <b>B-Class</b>    |                                                |
| <b>Given name</b> | <b>Protein name</b>                            |
| AtAP3             | AAD51899.1                                     |
| CmAP3             | Cm_g20682.t1                                   |
| VvAP3             | NP_001267960.1                                 |
| SlAP3             | NP_001234077.2                                 |
| MtAP3             | XP_003603721.1                                 |
| GmAP3             | XP_014629918.1                                 |
| CsAP3             | NP_001295864.1                                 |
| PpAP3             | XP_020415740.1                                 |
| AcAP3             | PSS31295.1                                     |
| PtAP3             | XP_006386194.1                                 |
| JrAP3             | XP_018821033.1                                 |
| ZmAP3             | ACG37775.1                                     |
| OsAP3             | BAH22555.1                                     |
| QsAP3             | QSP122988.0                                    |
| QrAP3             | Qrob_P0454040.2                                |
| QruAP3            | Quercus_rubra_120313_comp61142_c0_seq1_m.35060 |
| AtrAP3            | AAR06678.1                                     |
| PrPI              | AAF28863.1                                     |
| AtrPI             | XP_006847167.2                                 |
| AtPI              | P48007.1                                       |
| VvPI              | AAY79173.1                                     |
| CsPI              | NP_001292651.1                                 |
| PpPI              | XP_020410381.1                                 |

|                   |                                               |
|-------------------|-----------------------------------------------|
| MdPI              | CAC28022.1                                    |
| AcPI              | ADU15475.1                                    |
| PtPI              | XP_002300964.1                                |
| QsPI              | XP_023887186.1                                |
| SlPI              | ABG73411.1                                    |
| BpPI              | CAD32764.1                                    |
| JrPI              | XP_018811340.1                                |
| GmPI              | XP_003523422.2                                |
| MtPI              | ACJ36228.1                                    |
| OsPI              | AAC05723.1                                    |
| ZmPI              | ONM35875.1                                    |
| CmPI              | Cm_g4017.t1                                   |
| QrPI              | Qrob_P0600300.2                               |
| QsTM6.1           | XP_023911257.1                                |
| QsTM6.2           | XP_023911258.1                                |
| MdTM6             | BAC11907.1                                    |
| CuTM6             | GAY57755.1                                    |
| AcTM6             | ADU15473.1                                    |
| SITM6             | NP_001311309.1                                |
| PtTM6             | XP_024461070.1                                |
| MtTM6             | XP_003612101.1                                |
| CmTM6             | maker-scaffold03851-augustus-gene-0.22-mRNA-1 |
| <b>C/D-Class</b>  |                                               |
| <b>Given name</b> | <b>Protein name</b>                           |
| AtAG              | NP_567569.3                                   |
| AtrAG             | NP_001292764.1                                |
| PrAG              | AAD09342.1                                    |
| AmPLENA           | Q41195                                        |
| AmFAR             | Q9XFM8                                        |
| SlAG              | NP_001266181.1                                |
| CuAG              | BAF34911.1                                    |
| OsAG              | XP_015632498.1                                |
| PtAG              | XP_024455023.1                                |
| MdAG              | XP_008383546.1                                |
| JrAG              | XP_018830028.1                                |
| VvAG              | NP_001268097.1                                |
| PpAG              | XP_007211925.1                                |
| QsAG              | QSP034737.0                                   |
| BpAG              | CAB95649.1                                    |
| GmAG              | NP_001237504.1                                |
| CmAG              | AAZ77747.1                                    |
| MtAG              | XP_013462626.1                                |
| CsAG              | NP_001292633.1                                |
| ZmAG              | XP_008654205.1                                |
| AtrAG             | NP_001292764.1                                |
| PrAG              | AAD09342.1                                    |

|                |                                           |
|----------------|-------------------------------------------|
| AmFARINELLI    | tr Q9XFM8 Q9XFM8                          |
| AtSHP1         | NP_001190130.1                            |
| QruSHP         | Quercus_rubra_120313_comp19706_c0_seq1_m. |
| AcSHP          | PSS16392.1                                |
| MtSHP          | XP_024636027.1                            |
| SlSHP          | NP_001300859.1                            |
| QsSHP1         | QS001472.0                                |
| CmSHP          | Cm_g3306.t1                               |
| AtSHP2         | NP_850377.1                               |
| VvSHP          | NP_001268105.1                            |
| MdSHP          | CAC80857.1                                |
| PpSHP          | XP_007217264.4                            |
| QsSHP2         | QSP003163.0                               |
| CuSHP          | BAF34914.1                                |
| AmPLENA        | tr Q41195 Q41195                          |
| QsSTK          | XP_023895429.1                            |
| CmSTK          | KAF3963586.1                              |
| JrSTK          | XP_018841132.1                            |
| CsSTK          | NP_001267506.1                            |
| CuSTK          | GAY61853.1                                |
| PpSTK          | ABQ85556.1                                |
| VvSTK          | A0A217EJJ0.1                              |
| MdSTK          | NP_001280931.1                            |
| MtSTK          | XP_003598035.1                            |
| PtSTK1         | XP_024439317.1                            |
| PtSTK2         | XP_006376118.1                            |
| PtSTK3         | XP_006371450.1                            |
| SlSTK1         | XP_004241906.1                            |
| SlSTK2         | XP_010322781.1                            |
| <b>E-Class</b> |                                           |
| AtSEP1         | NP_001119230.1                            |
| AtSEP2         | AAU82009.1                                |
| AtSEP3         | NP_564214.2                               |
| AtSEP4         | NP_178466.1                               |
| GmSEP1         | AAZ86071.1                                |
| MdSEP1         | NP_001280893.1                            |
| MtSEP1.1       | XP_024642411.1                            |
| MtSEP1.2       | XP_024625956.1                            |
| PpSEP1.3       | XP_007215876.1                            |
| MtSEP1.2       | XP_024625956.1                            |
| PpSEP1.4       | XP_007215877.1                            |
| PpSEP1.2       | XP_020414319.1                            |
| PpSEP1.1       | XP_020414318.1                            |
| CuSEP1         | BAF95941.1                                |
| SlSEP1         | AAM33104.2                                |
| QsSEP1         | QSP061360.0                               |



|          |                                                |
|----------|------------------------------------------------|
| CmSEP1   | Cm_g47769.t1                                   |
| VvSEP1   | NP_001268109.1                                 |
| PtSEP1   | XP_002306051.2                                 |
| JrSEP1   | Juglans_regia_01182017_WALNUT_00001177-RA_mRNA |
| AcSEP1   | PSS35088.1                                     |
| AcSEP2   | PSS33641.1                                     |
| CmSEP2   | Cm_g360.t1                                     |
| OsSEP3   | XP_015648762.1                                 |
| QsSEP3   | XP_023899435.1                                 |
| QrSEP3   | Qrob_P0343740.2                                |
| CmSEP3   | Cm_g11185.t1                                   |
| BpSEP3   | CAB95648.1                                     |
| JrSEP3   | XP_018836792.1                                 |
| CuSEP3   | BAF34912.1                                     |
| PtSEP3   | XP_024437662.1                                 |
| CsSEP3   | XP_004140534.1                                 |
| MdSEP3   | NP_001280756.1                                 |
| PpSEP3   | XP_007223808.1                                 |
| VvSEP3   | NP_001268114.4                                 |
| SlSEP3   | NP_001234384.1                                 |
| AcSEP3.1 | PSS13691.1                                     |
| AcSEP3.2 | PSS28600.1                                     |
| AcSEP3.3 | PSS26973.1                                     |
| QsSEP4   | QSP022774.0                                    |
| CmSEP4.1 | Cm_g17299.t2                                   |
| CmSEP4.2 | Cm_g17299.t1                                   |
| AcSEP4   | ADU15479.1                                     |
| QrSEP4   | Qrob_P0128890.2                                |
| AtrSEP3  | NP_001292763.1                                 |
| PrSEP1   | AAD09206.1                                     |
| PrSEP3   | AAD09207.1                                     |

**Table S4** – List of primers

| <b>Amplicon</b>    | <b>Direction</b> | <b>Sequence (5' – 3')</b>         |
|--------------------|------------------|-----------------------------------|
| <i>CsaAP3</i> Y2H  | Forward          | AGGATCCAAATGGCAAGAGGAAAGATTCAGA   |
|                    | Reverse          | AACTGCAGCTACTCAAGCAAGGTGTAAGTTGTG |
| <i>CsaPI</i> Y2H   | Forward          | AGGATCCAAATGGGGAGAGGCAAGATTGAG    |
|                    | Reverse          | AACTGCAGTTACATTCTCTCTTGTAGATTGGC  |
| <i>CsaTM6</i> Y2H  | Forward          | AAAGTCGACAAATGGGTCTGTGGAAAGATCGAG |
|                    | Reverse          | AACTGCAGTCAAGCAAGGCGCAGATCC       |
| <i>CsaAG</i> Y2H   | Forward          | AGGATCCAAATGGTGTATCCGAACCAATCC    |
|                    | Reverse          | AACTGCAGTTAAACTAATTGAAGAGACATCTG  |
| <i>CsaSHP</i> Y2H  | Forward          | AGGATCCAAATGGGAAGAGGAAAGGTAGA     |
|                    | Reverse          | AACTGCAGTTAAAGGACAACCTCCATCTTGAA  |
| <i>CsaSEP2</i> Y2H | Forward          | AGGATCCAAATGGGGAGAGGAAGAGTTGAGC   |
|                    | Reverse          | AACTGCAGCTAAAGCATCCACCCAGGAA      |
| <i>CsaSEP3</i> Y2H | Forward          | AGGATCCAAATGGGTAGAGGAAGAGTGGAG    |
|                    | Reverse          | AACTGCAGTCATGGCATCCACCCTGA        |
| <i>CsaSEP4</i> Y2H | Forward          | AGGATCCAAATGGGAAGGGGGAGAGTG       |
|                    | Reverse          | AACTGCAGTCAAAGCATCCAGCCTGGAAT     |
| <i>CsaAP3</i>      | Forward          | TGGTGCTGTTATTGGATGCTCA            |
|                    | Reverse          | AGATCTGACCCTGCTCCACT              |
| <i>CsaPI</i>       | Forward          | CCGAGAAATGCAGATGGAGT              |
|                    | Reverse          | AATAGGCTGCACACGGAAGG              |
| <i>CsaTM6</i>      | Forward          | CTGCTCGATCTTAGGGCAAG              |
|                    | Reverse          | AGTTGGAGGCACCATTTGTC              |
| <i>CsaAG</i>       | Forward          | CCAGCTTCTCCGAGCAAAGA              |
|                    | Reverse          | CATCTGGTCTTCACGTGGGT              |
| <i>CsaSHP</i>      | Forward          | AGGGAAGTTGAGCTGCAAAA              |
|                    | Reverse          | CTGGGAGGTAGTTCCGATCA              |
| <i>CsaSEP2</i>     | Forward          | CAGGCAGGTGACATTTGCTA              |
|                    | Reverse          | GCTGGCTTCCAATGCACTAT              |
| <i>CsaSEP3</i>     | Forward          | TCAACACGGACGCAGTACAT              |
|                    | Reverse          | GGCCATATCCCATATCGTTG              |
| <i>CsaSEP4</i>     | Forward          | GCCCTCATCATCTTCTCCAA              |
|                    | Reverse          | CCTCAACTTTTGCCTTCAGC              |
| <i>CsaPPA2A3</i>   | Forward          | GGGTTCCCAACATCAAGTTC              |
|                    | Reverse          | TGACCTGATCACTTGACTGC              |

**A**

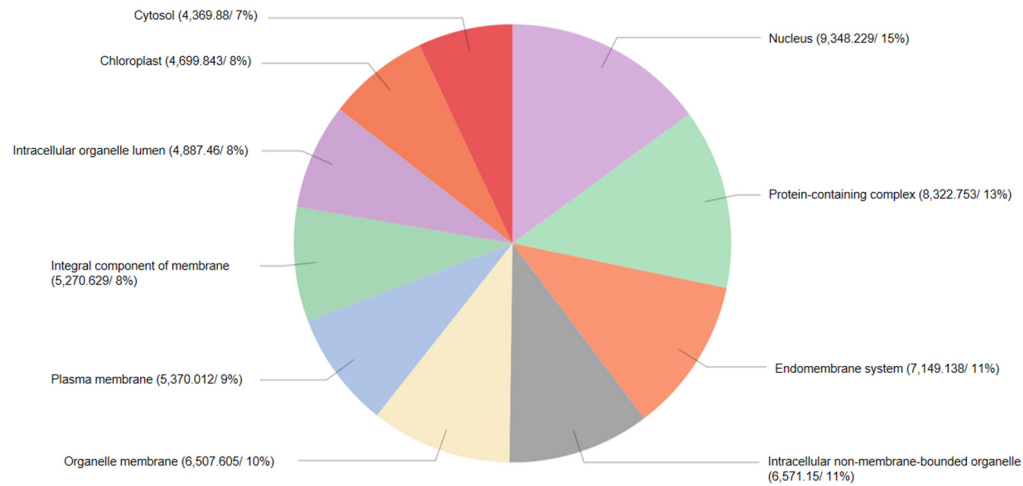

**B**

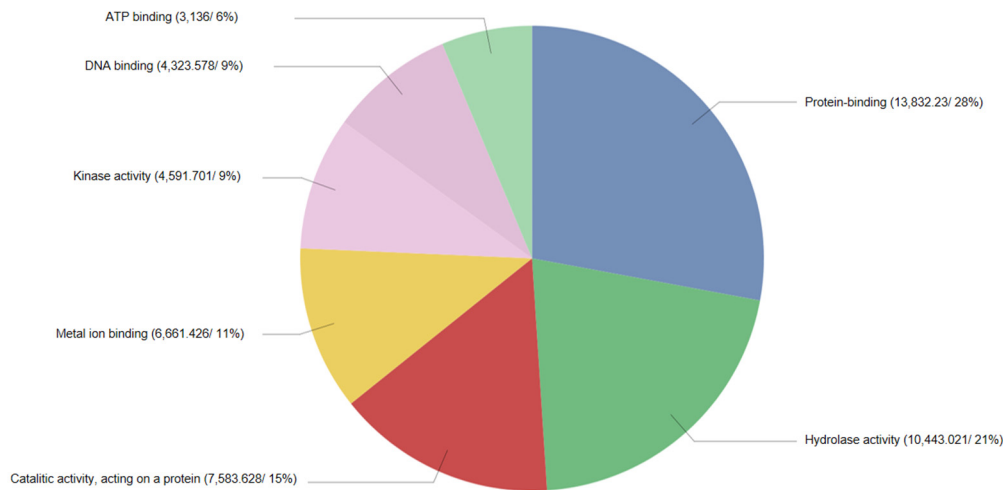

**C**

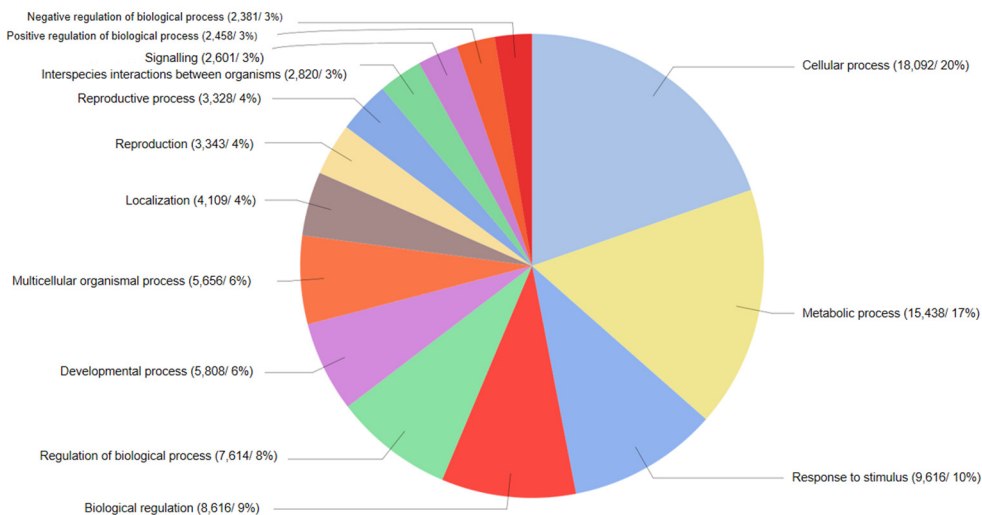

**Figure S1 – GO functional annotation of the *Castanea sativa* de novo transcriptome.** The transcripts were uploaded to Blast2GO and a blastx was performed, as well as an InterPro scan. The GO annotated transcripts were categorized according to cellular component (**A**), biological process (**B**) and molecular function (**C**).

[illegible]

**B**

|         |                                                          |    |
|---------|----------------------------------------------------------|----|
| AtAP3   | MARGKIQIKRIENQNRQVTSKRRNGLFKKAHETLVLCDAVSIIMFSSNKLHEYIS  | 60 |
| PpAP3   | MARGKIQIKRIENATNRQVTSKRRNGLFKKAHETLVLCDAVSLIMVNSGKHEYIS  | 60 |
| CsAP3   | MARGKIQIKRIENPTNRQVTSKRRNGLFKKAHETLVLCDAVSIIMFSSGKLHEYIS | 60 |
| PrAP3   | MARGKIQIKRIENSTNRQVTSKRRNGLFKKAHETLVLCDAVSLIMVNSGKHEYIS  | 60 |
| JrPI    | MARGKIQIKRIENSTNRQVTSKRRNGLFKKAHETLVLCDAVSLIMVNSGKLRDYIS | 60 |
| MtAP3   | MARGKIQIKRIENSTNRQVTSKRRNGLFKKAHETLVLCDAVSIIMFSSGKLHEYIS | 60 |
| GmAP3   | MARGKIQIKRIENSTNRQVTSKRRNGLFKKAHETLVLCDAVSIIMFSSGKLHEYIS | 60 |
| SIAP3   | MARGKIQIKRIENSTNRQVTSKRRNGLFKKAHETLVLCDAVSIIMVNSGKLHEYIS | 60 |
| VvAP3   | MARGKIEIKRIENSTNRQVTSKRRNGLFKKAHETLVLCDAVSIIMVNSGKLHEYIS | 60 |
| AcAP3   | MARGKIQIKRIENSTNRQVTSKRRNGLFKKAHETLVLCDAVSIIMVNSGKLHEYIS | 60 |
| QrAP3   | MARGKIQIKRIENSTNRQVTSKRRNGLFKKAHETLVLCDAVSIIMVNSGKLHEYIS | 60 |
| CmAP3   | MARGKIQIKRIENSTNRQVTSKRRNGLFKKAHETLVLCDAVSIIMVNSGKLHEYIS | 60 |
| CsaAP3  | MARGKIQIKRIENSTNRQVTSKRRNGLFKKAHETLVLCDAVSIIMVNSGKLHEYIS | 60 |
| QsAP3   | MARGKIQIKRIENSTNRQVTSKRRNGLFKKAHETLVLCDAVSIIMVNSGKLHEYIS | 60 |
| QruAP3  | MARGKIQIKRIENSTNRQVTSKRRNGLFKKAHETLVLCDAVSIIMVNSGKLHEYIS | 60 |
| ZmAP3   | MARGKIEIKRIENATNRQVTSKRRNGLFKKAHETLVLCDAVSIIMFSSGKLHEYIS | 60 |
| OsAP3   | MARGKIEIKRIENATNRQVTSKRRNGLFKKAHETLVLCDAVSIIMFSSGKLHEYIS | 60 |
| AtrAP3  | -----AGITKKARELAVLCDAVSIIMFSSGKLSEYIS                    | 35 |
| MtTM6   | MARGKIEIKRIENPTNRQVTSKRRNGLFKKAHETLVLCDAVSIIMFSSGKLHEYIS | 60 |
| SITM6   | MARGKIEIKRIENSTNRQVTSKRRNGLFKKAHETLVLCDAVSIIMFSSGKLHEYIS | 60 |
| PtTM6   | MARGKIEIKRIENPTNRQVTSKRRNGLFKKAHETLVLCDAVSIIMFSSGKLHEYIS | 60 |
| MdTM6   | MARGKIEIKRIENPTNRQVTSKRRNGLFKKAHETLVLCDAVSIIMFSSGKLHEYIS | 60 |
| CutTM6  | MARGKIEIKRIENPTNRQVTSKRRNGLFKKAHETLVLCDAVSIIMFSSGKLHEYIS | 60 |
| ActTM6  | MARGKIEIKRIENPTNRQVTSKRRNGLFKKAHETLVLCDAVSIIMFSSGKLHEYIS | 60 |
| QsTM6.2 | MARGKIEIKRIENPTNRQVTSKRRNGLFKKAHETLVLCDAVSIIMFSSGKLHEYIS | 53 |
| QsTM6.1 | MARGKIEIKRIENPTNRQVTSKRRNGLFKKAHETLVLCDAVSIIMFSSGKLHEYIS | 53 |
| CmTM6   | MARGKIEIKRIENPTNRQVTSKRRNGLFKKAHETLVLCDAVSIIMFSSGKLHEYIS | 60 |
| CsaTM6  | MARGKIEIKRIENPTNRQVTSKRRNGLFKKAHETLVLCDAVSIIMFSSGKLHEYIS | 60 |
| PpPI    | MARGKIEIKRIENATNRQVTSKRRNGLFKKAHETLVLCDAVSIIMFSSGKLHEYIS | 60 |
| OsPI    | MARGKIEIKRIENSTNRQVTSKRRNGLFKKAHETLVLCDAVSIIMFSSGKLHEYIS | 60 |
| ZmPI    | MARGKIEIKRIENSTNRQVTSKRRNGLFKKAHETLVLCDAVSIIMFSSGKLHEYIS | 60 |
| AtrPI   | MARGKIEIKRIENSTNRQVTSKRRNGLFKKAHETLVLCDAVSIIMFSSGKLHEYIS | 60 |
| AtPI    | MARGKIEIKRIENSTNRQVTSKRRNGLFKKAHETLVLCDAVSIIMFSSGKLHEYIS | 60 |
| SIPI    | MARGKIEIKRIENSTNRQVTSKRRNGLFKKAHETLVLCDAVSIIMFSSGKLHEYIS | 60 |
| JrPI    | MARGKIEIKRIENSTNRQVTSKRRNGLFKKAHETLVLCDAVSIIMFSSGKLHEYIS | 60 |
| BpPI    | MARGKIEIKRIENSTNRQVTSKRRNGLFKKAHETLVLCDAVSIIMFSSGKLHEYIS | 60 |
| QrPI    | MARGKIEIKRIENSTNRQVTSKRRNGLFKKAHETLVLCDAVSIIMFSSGKLHEYIS | 60 |
| QsPI    | MARGKIEIKRIENSTNRQVTSKRRNGLFKKAHETLVLCDAVSIIMFSSGKLHEYIS | 60 |
| CmPI    | MARGKIEIKRIENSTNRQVTSKRRNGLFKKAHETLVLCDAVSIIMFSSGKLHEYIS | 60 |
| CsaPI   | MARGKIEIKRIENSTNRQVTSKRRNGLFKKAHETLVLCDAVSIIMFSSGKLHEYIS | 60 |
| PpPI    | MARGKIEIKRIENSTNRQVTSKRRNGLFKKAHETLVLCDAVSIIMFSSGKLHEYIS | 60 |
| MdPI    | MARGKIEIKRIENSTNRQVTSKRRNGLFKKAHETLVLCDAVSIIMFSSGKLHEYIS | 60 |
| GmPI    | MARGKIEIKRIENSTNRQVTSKRRNGLFKKAHETLVLCDAVSIIMFSSGKLHEYIS | 60 |
| MtPI    | MARGKIEIKRIENSTNRQVTSKRRNGLFKKAHETLVLCDAVSIIMFSSGKLHEYIS | 60 |
| PtPI    | MARGKIEIKRIENSTNRQVTSKRRNGLFKKAHETLVLCDAVSIIMFSSGKLHEYIS | 60 |
| CsPI    | MARGKIEIKRIENSTNRQVTSKRRNGLFKKAHETLVLCDAVSIIMFSSGKLHEYIS | 60 |
| VvPI    | MARGKIEIKRIENSTNRQVTSKRRNGLFKKAHETLVLCDAVSIIMFSSGKLHEYIS | 60 |
| AcPI    | MARGKIEIKRIENSTNRQVTSKRRNGLFKKAHETLVLCDAVSIIMFSSGKLHEYIS | 60 |

\*: \*\*\* \*: \*\*: : : : : : :

|         |                                                              |     |
|---------|--------------------------------------------------------------|-----|
| AtAP3   | NT-----TTKEIVDLYQTISD-VDMWATYERMQETKRKLLLETNRRLRTQIKQR-LGE-  | 111 |
| PpAP3   | ST-----TTKQFFDQKTKG-VDIWSSHYEAMQELKLLKEVNRRLKQIRQRVLGE-      | 112 |
| CsAP3   | AT-----STKELFDQYQKTLG-VDLWHTHYERMQELKLLKDNINRLRQIRQR-MGE-    | 111 |
| PrAP3   | ST-----TTKRIFDQYQKTKG-IDLWSSHYEIMKENLEKLLKEVINRIRREIRQR-MGQ- | 111 |
| JrPI    | ST-----TTKQIFDQYQHTIG-VDLWSSHYERMQELKLLKDNVNRRLRKEIRQR-RGE-  | 111 |
| MtAP3   | SA-----STKQFFDQYQHTIG-IDLWSSHYENMQELKLLKDNVNRRLRKEIRQR-MGE-  | 111 |
| GmAP3   | SI-----STKQFFDQYQHTIG-VDLWSSHYENMQELKLLKDNVNRRLRKEIRQR-MGQ-  | 111 |
| SIAP3   | ST-----TTKQLFDLYQKTLG-VDIWHTHYEKMQELKLLKDNVNRRLRKEIRQR-MGE-  | 111 |
| VvAP3   | ST-----TTKQIFDQYQHTIG-VDLWSSHYERMQELKLLKDNVNRRLRKEIRQR-MGE-  | 111 |
| AcAP3   | SV-----ATKQFFDQYQKTLG-IDLWSSHYEKMQELKLLKDNVNRRLRKEIRQR-MGE-  | 111 |
| QrAP3   | ST-----TTKQLIDEYQKAKE-TDIWSSHYERMQELKLLKEVINRRLRTEIRQR-RGE-  | 111 |
| CmAP3   | ST-----TTKQLIDEYQKAKE-TDIWSSHYERMQELKLLKEVINRRLRTEIRQR-RGE-  | 111 |
| CsaAP3  | ST-----TTKQLIDEYQKAKE-TDIWSSHYERMQELKLLKEVINRRLRTEIRQR-RGE-  | 111 |
| QsAP3   | ST-----TTKQLIDEYQKAKE-TDIWSSHYERMQELKLLKEVINRRLRTEIRQR-RGE-  | 111 |
| QruAP3  | ST-----TTKQLIDEYQKAKE-TDIWSSHYERMQELKLLKEVINRRLRTEIRQR-RGE-  | 111 |
| ZmAP3   | GT-----DIKTIIDRYQQAIG-TSLWIEHYENMQELKLLKDNVNRRLRKEIRQR-MGE-  | 111 |
| OsAP3   | ST-----DIKTIIDRYQQAIG-TSLWIEHYENMQELKLLKDNVNRRLRKEIRQR-MGE-  | 111 |
| AtAP3   | ST-----SPKEIYDRYQVSD-TNLWDTHYERMQELKLLKEVINRRLRKEIRQR-MGE-   | 86  |
| MtTM6   | GL-----STKKIIDQYQKTLG-DIWLWSSHYEKMQELKLLKEVINRRLRKEIRQR-TGE- | 113 |
| SITM6   | NT-----TTKKIIDQYQKTLG-VDIWSSHYEKMQELKLLKEVINRRLRKEIRQR-TGE-  | 111 |
| PtTM6   | ST-----STKKIIDQYQKTLG-IDLWHTHYEKMQELKLLKDNVNRRLRKEIRQR-RGE-  | 111 |
| MdTM6   | TT-----TTKSHYDQYQKTLG-IDLWHTHYEKMQELKLLKEVINRRLRKEIRQR-LGH-  | 111 |
| CutTM6  | TT-----TTKSHYDQYQKTLG-VDIWHTHYEKMQELKLLKEVINRRLRKEIRQR-MGE-  | 111 |
| ActTM6  | NI-----STKKIIDQYQKTLG-TDLWSSHYERMQELKLLKEVINRRLRKEIRQR-MGE-  | 111 |
| QsTM6.2 | SI-----TTKKIYDQYQKALD-TDLWSSHYEKMQELKLLKEVINRRLRKEIRQR-VGE-  | 104 |
| QsTM6.1 | SI-----TTKKIYDQYQKALD-TDLWSSHYEKMQELKLLKEVINRRLRKEIRQR-VGE-  | 104 |
| CmTM6   | SI-----TTKKIYDQYQKALD-TDLWSSHYERMQELKLLKEVINRRLRKEIRQR-VGE-  | 111 |
| CsaTM6  | SI-----TTKKIYDQYQKALD-TDLWSSHYERMQELKLLKEVINRRLRKEIRQR-VGE-  | 111 |
| PpPI    | SSFFHLQKSHKKILERYQKSEQLGLUDYHQQLCEHRRITKENESLQELRHHI-MGE-    | 118 |
| OsPI    | KT-----TSLRIILEKYQKNSGK-ILWGECHKSLSAEIRIKKENDSHQIELRHL-MGE-  | 111 |
| ZmPI    | KT-----TSLRIILEKYQKNSGK-ILWGECHKSLSAEIRIKKENDSHQIELRHL-MGE-  | 111 |
| AtrPI   | SI-----ELKNILWEEYQKNSGK-KLWDAKHENLSNEIDRIKKENDSHQIELRHL-MGE- | 111 |
| AtPI    | SI-----DLGAMLDQYQKLSGK-KLWDAKHENLSNEIDRIKKENDSHQIELRHL-MGE-  | 111 |
| SIPI    | ST-----TSLDMLDQYQKLSGK-KLWDAKHENLSNEIDRIKKENDSHQIELRHL-MGE-  | 111 |
| JrPI    | ST-----SLVDLLEDYHQKSGK-KLWDAKHENLSNEIDRIKKENDSHQIELRHL-MGE-  | 112 |
| BpPI    | ST-----TLINILDMYHQRSEK-KLWDAKHENLSNEIDRIKKENDSHQIELRHL-MGE-  | 111 |
| QrPI    | ST-----TLINILDMYHQRSEK-KLWDAKHENLSNEIDRIKKENDSHQIELRHL-MGE-  | 111 |
| QsPI    | ST-----TLIDILDKYHQKSGK-KLWDAKHENLSNEIDRIKKENDSHQIELRHL-MGE-  | 111 |
| CmPI    | ST-----TLIDILDKYHQKSGK-KLWDAKHENLSNEIDRIKKENDSHQIELRHL-MGE-  | 111 |
| CsaPI   | ST-----TLIDILDKYHQKSGK-KLWDAKHENLSNEIDRIKKENDSHQIELRHL-MGE-  | 111 |
| PpPI    | SV-----TVTDILDKYHQKSGK-KLWDAKHENLSNEIDRIKKENDSHQIELRHL-MGE-  | 111 |
| MdPI    | ST-----TLIDILDKYHQKSGK-KLWDAKHENLSNEIDRIKKENDSHQIELRHL-MGE-  | 111 |
| GmPI    | ST-----TLIDILDKYHQKSGK-KLWDAKHENLSNEIDRIKKENDSHQIELRHL-MGE-  | 111 |
| MtPI    | ST-----TVVDILDKYHQKSGK-KLWDAKHENLSNEIDRIKKENDSHQIELRHL-MGE-  | 111 |
| PtPI    | ST-----PLVDILDKYHQKSGK-KLWDAKHENLSNEIDRIKKENDSHQIELRHL-MGE-  | 111 |
| CsPI    | ST-----TLIDILDKYHQKSGK-KLWDAKHENLSNEIDRIKKENDSHQIELRHL-MGE-  | 111 |
| VvPI    | ST-----TLIDILDKYHQKSGK-KLWDAKHENLSNEIDRIKKENDSHQIELRHL-MGE-  | 111 |
| AcPI    | ST-----TLVDILDKYHQKSGK-KLWDAKHENLSNEIDRIKKENDSHQIELRHL-MGE-  | 111 |

: : : : : : : : : : : : : : : :



AtAP3 --CLDELDI-QELRLEDEHENTFKLVREKFKSLGSQIETTKKK----- 153  
PpAP3 --CLNDMSF-DELRGVEQHEGAVEIRKRIRMSNQIDTTKKK----- 154  
CsAP3 --CMNDLSF-EELRCLQEQHDSAVRIERKRVISNQIETHKKK----- 153  
PtAP3 --CLNGLSF-QDLQSLQESDMESAHVIRDRADRLTNQIETSKKK----- 153  
JrPI --SLIDLNL-EELYHLEQWVESAVKVIIRDKRYHVIGKTDILKKK----- 153  
MtAP3 --CLNDLSH-EELRLLEDEHDKAAKAIERKRYVITNQIDTQRKK----- 153  
GmAP3 --CLNELGH-EDLKLLEEEDHGAKVREKRYVITNQIDTQRKK----- 153  
SIAP3 --SLNDLNY-EQLLEEMENVDNLSKLIRERKRYVIGNQIETYRKK----- 153  
VvAP3 --HLSDSLVS-EELRDLEQHESSSLKVIIRDKRYVITNQIETFKKK----- 153  
AcAP3 --SLNELSY-EDLHGLELDVETSLKIRDRNRYKVISNQIATYKKK----- 153  
QrAP3 --SANDLSL-EKWHILEQHEHNAVKVIRERKRVISNQIETFKKK----- 153  
CmAP3 --SANDLSL-EKWHILEQHEHNAVKVIRDRKRVISNQIETFKKK----- 153  
CsAP3 --SANDLSL-EKWHILEQHEHNAVKVIRDRKRVISNQIETFKKK----- 153  
QsAP3 --SANDLSL-EKWHILEQHEHNAVKVIRDRKRYVITNQIETFKKK----- 153  
QruAP3 --SANDLSL-EKWHILEQHEHNAVKVIRDRKRVISNQIETFKKK----- 153  
ZmAP3 --DLDSLDF-DELRGLEQWDAALKKEVHRKRYHVISTQDTYKKK----- 153  
OsAP3 --DLDSLDF-DELRGLEQWDAALKKEVHRKRYHVISTQDTYKKK----- 153  
AtrAP3 --ELNELRH-KDLRLQLEQWDAALKKEVHRKRYHVISTQDTYKKK----- 128  
MtTM6 --GHELDLDF-QQLRSLQEQHDSAVRIERKRVISNQIETSKKK----- 157  
SITM6 --DMSGLNL-QELCHLEQHEHNAVKVIRDRKRVISNQIETSKKK----- 153  
PtTM6 --GLNDLSI-DHLRGLEQHEHNAVKVIRDRKRVISNQIETSKKK----- 153  
MdTM6 --DLNGLSY-DLRLSLEQHEHNAVKVIRDRKRVISNQIETSKKK----- 153  
CuTM6 --DLDDLTF-EELRGLEQHEHNAVKVIRDRKRVISNQIETSKKK----- 153  
AcTM6 --ELNDLSV-HELRLQLEQHEHNAVKVIRDRKRVISNQIETSKKK----- 153  
QsTM6.2 --DLNGLSL-DLRLSLEQHEHNAVKVIRDRKRVISNQIETSKKK----- 132  
QsTM6.1 --DLNGLSL-DLRLSLEQHEHNAVKVIRDRKRVISNQIETSKKK----- 146  
CmTM6 --DLNGLSL-DLRLSLEQHEHNAVKVIRDRKRVISNQIETSKKK----- 153  
CsaTM6 --DLNGLSL-DLRLSLEQHEHNAVKVIRDRKRVISNQIETSKKK----- 153  
PpPI --EVNLSKL-PELFKLEQDKAAQVRRKRVISNQIETSKKK----- 173  
OsPI --DLNLSQP-KELIAIEEALNIGQANLRDKH-----MDHH-----RIHK 147  
ZmPI --DLNLSQP-KELIAIEEALNIGQANLRDKH-----MDHH-----RIHK 163  
AtrPI --DLNLSQP-KELIAIEEALNIGQANLRDKH-----MDHH-----RIHK 151  
AtPI --DIQSLNL-KNLHAEHAEHGLDKVDRHQ-----MEIL-----ISKR 147  
SIPI --DINQLTH-KELIAIEEALNIGQANLRDKH-----SEIL-----RIHK 147  
JrPI --DISSMDAKELVLEALNIGQANLRDKH-----MDFL-----KIAK 149  
BpPI --DITSLNH-RELHAEHAEHGLDKVDRHQ-----MDLL-----MRAR 147  
QrPI --DITSLNP-KELTLEALNIGQANLRDKH-----MDLL-----MRAR 140  
QsPI --DITSLNP-KELTLEALNIGQANLRDKH-----MDLL-----MRAR 147  
CmPI --DITSLNP-KELTLEALNIGQANLRDKH-----MDLL-----MRAR 147  
CsaPI --DITSLNP-KELTLEALNIGQANLRDKH-----MDLL-----MRAR 147  
PpPI --DITSLNP-KELTLEALNIGQANLRDKH-----MDLL-----MRAR 147  
MdPI --DITSLNP-KELTLEALNIGQANLRDKH-----MDLL-----MRAR 147  
GmPI --DITSLNP-KELTLEALNIGQANLRDKH-----MDLL-----MRAR 147  
MtPI --DITSLNP-KELTLEALNIGQANLRDKH-----MDLL-----MRAR 147  
PPI --DITSLNP-KELTLEALNIGQANLRDKH-----MDLL-----MRAR 147  
CsPI --DITSLNP-KELTLEALNIGQANLRDKH-----MDLL-----MRAR 147  
VvPI --DITSLNP-KELTLEALNIGQANLRDKH-----MDLL-----MRAR 147  
AcPI --DITSLNP-KELTLEALNIGQANLRDKH-----MDLL-----MRAR 147

AtAP3 --NKSQQDIQKNIHELEL-RAEDPHYGLVDNG-----GDYD-----SVLGQIE-GS 197  
PpAP3 --LRSATEHNRNL-REFDA-RDOPHYGLVDNG-----EDYE-----SAFGSSNGGP 198  
CsAP3 --LKSVEIHKSLQEFDATEEDPHYGLVDNGGVGGIGGDYD-----SIMGFSGAHP 207  
PtAP3 --ARNVEQINRKLQVELEA-MDQDPY-GLVDNG-----GDYD-----SVMGF----- 191  
JrPI --KKRAESIHKVLLHELVA-RDEDPYGLVDNG-----GDYD-----DPDIIGCSNT-DS 199  
MtAP3 --FNNEREVHNRLLRDLD-RAEDPHYGLVDNG-----GEYE-----SVIGFSNL-GP 197  
GmAP3 --FNNEREVHNRLLRDLD-RAEDPHYGLVDNG-----GEYE-----SVIGFSNL-GP 197  
SIAP3 --VRNVEEINRNLLEFEDA-RQEDPHYGLVDNG-----GDYD-----SVLGFPTG-GP 197  
VvAP3 --VRNVEEINRNLLEFEDA-RQEDPHYGLVDNG-----GDYD-----SVLGFPTG-GP 197  
AtrAP3 --LRNVEEINRNLLEFEDA-RQEDPHYGLVDNG-----GDYD-----SVLGFPTG-GP 197  
QrAP3 --LRSADIKHNRLLNGDA-GNEDPHYGLVDNG-----GDYD-----AVIGCSNG-DP 197  
CmAP3 --LRNAKEIHRNLHEIDA-GNEDPHYGLVDNG-----GDYD-----AVIGCSNG-DP 196  
CsAP3 --LRNAKEIHRNLHEIDA-GNEDPHYGLVDNG-----GDYD-----AVIGCSNG-DP 196  
QsAP3 --LRNAKEIHRNLHEIDA-GNEDPHYGLVDNG-----GDYD-----AVIGCSNG-DP 197  
QruAP3 --LRNAKEIHRNLHEIDA-GNEDPHYGLVDNG-----GDYD-----AVIGCSNG-DP 197  
ZmAP3 --VKHSHEAYKNLQQLG-LRDEPAFGYVDNT-----GGG-----WDGGAG-AGAA-AA 200  
OsAP3 --VKHSHEAYKNLQQLG-LRDEPAFGYVDNT-----GGG-----WDGGAG-AGAA-AA 197  
AtrAP3 --INKLEAENNTIRLQIE-----R----- 144  
MtTM6 --VRSLEQWNGNLLLELEK-CVIMQFLF-HDE-----GDDE-----SAVALANG-AS 200  
SITM6 --ARNLEEQNGNLLLELEK-CPKYGVVENE-----GHYH-----SAVAFANG-VH 197  
PtTM6 --VKNLLEERHGNLLMEYEAKE-DPQYGLVDNE-----GDYD-----SAVALANG-AS 193  
MdTM6 --VKNLLEERHGNLLMEYEAKE-DPQYGLVDNE-----GDYD-----SAVALANG-AN 197  
CuTM6 --VRNLEERHGNLLDFETKYD-DPHYGLVDN-----GDYD-----SAVALANG-AS 196  
AcTM6 --VRNLEERHGNLLDFETKYD-DPHYGLVDN-----GDYD-----SAVALANG-VS 198  
QsTM6.2 --VKNLLEERHGNLLDLARLE-DPQYGLVDNE-----GDYD-----STIALTNG-AS 176  
QsTM6.1 --VKNLLEERHGNLLDLARLE-DPQYGLVDNE-----GDYD-----STIALTNG-AS 190  
CmTM6 --VKNLLEERHGNLLDLARLE-DPQYGLVDNE-----GDYD-----STIALTNG-AS 197  
CsaTM6 --VKNLLEERHGNLLDLARLE-DPQYGLVDNE-----GDYD-----STIALTNG-AS 197  
PpPI --RQGHHEEDNGQFNVLYQP-----VKKH-----R-----TA 200  
OsPI --RNEKILEDEHNAVKVIRDRKRVISNQIETSKKK-----EVLSSG-----GIREL-LGYH-HD-----DROFA-----AS 192  
ZmPI --TKTKWMEENKLLAFKHHQ-----DIALSG-----SIREL-LGYH-P-----DROFA-----AQ 207  
AtrPI --NNEKILEDEHNAVKVIRDRKRVISNQIETSKKK-----EGGDEA-----RRYQ-NQONGRDYP-----QQ 193  
AtPI --RNEKILEDEHNAVKVIRDRKRVISNQIETSKKK-----EVLSSG-----GIREL-LGYH-HD-----DROFA-----AS 184  
SIPI --KNDQIEEENKQLYALHQ-----EIMAGTSGGNGIRGIH-EEV-YHQREDEY-----YQ 196  
JrPI --KNEKILEEENKHLNLILHQ-----EIMAGTSGGNGIRGIH-EEV-YHQREDEY-----YQ 195  
BpPI --KNDQIEEENKQLYALHQ-----EIMAGTSGGNGIRGIH-EEV-YHQREDEY-----YQ 193  
QrPI --NGTELEENKHLNLILHQ-----EIMAGTSGGNGIRGIH-EEV-YHQREDEY-----YQ 184  
QsPI --NTELEENKHLNLILHQ-----EIMAGTSGGNGIRGIH-EEV-YHQREDEY-----YQ 191  
CmPI --NTELEENKHLNLILHQ-----EIMAGTSGGNGIRGIH-EEV-YHQREDEY-----YQ 191  
CsaPI --NTELEENKHLNLILHQ-----EIMAGTSGGNGIRGIH-EEV-YHQREDEY-----YQ 191  
PpPI --KNEKILEEENKHLNLILHQ-----EIMAGTSGGNGIRGIH-EEV-YHQREDEY-----YQ 192  
MdPI --DNGKALEENKHLNLILHQ-----EIMAGTSGGNGIRGIH-EEV-YHQREDEY-----YQ 197  
GmPI --RNDKILEEENKHLNLILHQ-----EIMAGTSGGNGIRGIH-EEV-YHQREDEY-----YQ 181  
MtPI --RNDKILEEENKHLNLILHQ-----EIMAGTSGGNGIRGIH-EEV-YHQREDEY-----YQ 181  
PPI --RNDKILEEENKHLNLILHQ-----EIMAGTSGGNGIRGIH-EEV-YHQREDEY-----YQ 193  
CsPI --RNDKILEEENKHLNLILHQ-----EIMAGTSGGNGIRGIH-EEV-YHQREDEY-----YQ 193  
VvPI --KNDKILEEENKHLNLILHQ-----EIMAGTSGGNGIRGIH-EEV-YHQREDEY-----YQ 194  
AcPI --RNDKILEEENKHLNLILHQ-----EIMAGTSGGNGIRGIH-EEV-YHQREDEY-----YQ 190

C

```

SISTK2 -----MRGKIEIKRIENNTNRQVTFCKRRNGLKKAYELSVLC 39
SISTK1 -----MMILCMRGKIEIKRIENNTNRQVTFCKRRNGLKKAYELSVLC 44
CsaSTK -----MCLGLSSCAMRRKIEIKRIENNTNRQVTFCKRRNGLKKAYELSVLC 48
AtSTK -----RKKEKER-SQGFLVTLRLIRMRGKIEIKRIENNTNRQVTFCKRRNGLKKAYELSVLC 65
QsSTK -----MRGKIEIKRIENNTNRQVTFCKRRNGLKKAYELSVLC 39
CmSTK -----MRGKIEIKRIENNTNRQVTFCKRRNGLKKAYELSVLC 39
JrSTK -----MRGKIEIKRIENNTNRQVTFCKRRNGLKKAYELSVLC 39
PpSTK -----MGGKIEIKRIENNTNRQVTFCKRRNGLKKAYELSVLC 39
MdSTK -----MRGKIEIKRIENNTNRQVTFCKRRNGLKKAYELSVLC 39
VvSTK -----MRGKIEIKRIENNTNRQVTFCKRRNGLKKAYELSVLC 39
CsSTK -----MRGKIEIKRIENNTNRQVTFCKRRNGLKKAYELSVLC 39
MtSTK -----MRGKIEIKRIENNTNRQVTFCKRRNGLKKAYELSVLC 39
CuSTK -----MRGKIEIKRIENNTNRQVTFCKRRNGLKKAYELSVLC 39
PtSTK3 -----MRGKIEIKRIENNTNRQVTFCKRRNGLKKAYELSVLC 39
PtSTK1 -----MRGKIEIKRIENNTNRQVTFCKRRNGLKKAYELSVLC 39
PtSTK2 -----MRGKIEIKRIENNTNRQVTFCKRRNGLKKAYELSVLC 39
AtSHP1 -----MEEGSSHDAESSKLLRGKIEIKRIENNTNRQVTFCKRRNGLKKAYELSVLC 54
AtSHP2 -----MEEGASNEVAESSKLLRGKIEIKRIENNTNRQVTFCKRRNGLKKAYELSVLC 54
MtSHP -----GEGSSQKKMRGKIEIKRIENNTNRQVTFCKRRNGLKKAYELSVLC 54
PpSHP -----PESSSQKMRGKIEIKRIENNTNRQVTFCKRRNGLKKAYELSVLC 54
MdSHP -----PESSSQKMRGKIEIKRIENNTNRQVTFCKRRNGLKKAYELSVLC 54
AtAG -----TAYQSELGGDSPLRKSGRGKIEIKRIENNTNRQVTFCKRRNGLKKAYELSVLC 55
SISHP -----QELLVDESSQLKRTSGGTGGGRGKIEIKRIENNTNRQVTFCKRRNGLKKAYELSVLC 66
CuSHP -----NP-----ESSSQKMRGKIEIKRIENNTNRQVTFCKRRNGLKKAYELSVLC 65
AmPLENA -----D-----SESLRKNMRGKIEIKRIENNTNRQVTFCKRRNGLKKAYELSVLC 52
CsaSHP -----QA-----LEGSSQKMRGKIEIKRIENNTNRQVTFCKRRNGLKKAYELSVLC 54
CmSHP -----QA-----LEGSSQKMRGKIEIKRIENNTNRQVTFCKRRNGLKKAYELSVLC 102
QsSHP1 -----QA-----LEGSSQKMRGKIEIKRIENNTNRQVTFCKRRNGLKKAYELSVLC 59
QruSHP -----QA-----LEGSSQKMRGKIEIKRIENNTNRQVTFCKRRNGLKKAYELSVLC 54
QsSHP2 -----QA-----LEGSSQKMRGKIEIKRIENNTNRQVTFCKRRNGLKKAYELSVLC 59
AcSHP -----ES-----EGSSQKMRGKIEIKRIENNTNRQVTFCKRRNGLKKAYELSVLC 53
VvSHP -----MRGKIEIKRIENNTNRQVTFCKRRNGLKKAYELSVLC 39
CuAG -----LAAGR-----EELSPKRMGRGKIEIKRIENNTNRQVTFCKRRNGLKKAYELSVLC 58
PtAG -----YQNES-----LESSPLRKLGRGKIEIKRIENNTNRQVTFCKRRNGLKKAYELSVLC 54
VvAG -----MRGKIEIKRIENNTNRQVTFCKRRNGLKKAYELSVLC 39
OsAG -----SGSSAAVAAGSSEKMRGKIEIKRIENNTNRQVTFCKRRNGLKKAYELSVLC 79
ZmAG -----SGD-----RQGGMRGKIEIKRIENNTNRQVTFCKRRNGLKKAYELSVLC 71
PrAG -----MRGKIEIKRIENNTNRQVTFCKRRNGLKKAYELSVLC 39
SIAG -----QSDLTREISPRKLGRGKIEIKRIENNTNRQVTFCKRRNGLKKAYELSVLC 55
AmFARINELLI -----LSDQSTEVSPERKMRGKIEIKRIENNTNRQVTFCKRRNGLKKAYELSVLC 55
AtrAG -----MRGKIEIKRIENNTNRQVTFCKRRNGLKKAYELSVLC 39
MdAG -----ESKSLMDSPRKLGRGKIEIKRIENNTNRQVTFCKRRNGLKKAYELSVLC 55
PpAG -----ENKSHSLDSPRKLGRGKIEIKRIENNTNRQVTFCKRRNGLKKAYELSVLC 55
CmAG -----PNQSHSL-SPQRKMRGKIEIKRIENNTNRQVTFCKRRNGLKKAYELSVLC 54
QsAG -----PNQSHSL-SPQRKMRGKIEIKRIENNTNRQVTFCKRRNGLKKAYELSVLC 54
CsaAG -----PNQSHSL-SPQRKMRGKIEIKRIENNTNRQVTFCKRRNGLKKAYELSVLC 54
JrAG -----PDQSHSV-SPQRKMRGKIEIKRIENNTNRQVTFCKRRNGLKKAYELSVLC 54
BpAG -----QNQSHSV-SPQRKMRGKIEIKRIENNTNRQVTFCKRRNGLKKAYELSVLC 54
CaAG -----QNQSHSV-SPQRKMRGKIEIKRIENNTNRQVTFCKRRNGLKKAYELSVLC 54
CsAG -----QEEKMSD-SPQRKMRGKIEIKRIENNTNRQVTFCKRRNGLKKAYELSVLC 55
GmAG -----PDPSMSV-SPQRKMRGKIEIKRIENNTNRQVTFCKRRNGLKKAYELSVLC 54
MtAG -----PNESHMSD-SPQRKMRGKIEIKRIENNTNRQVTFCKRRNGLKKAYELSVLC 54

```

```

SISTK2 -----EAEIALIVFSTRGRVVEYNN-N-----IKATIERYKKAT 73
SISTK1 -----EAEIALIVFSTRGRVVEYNN-N-----IKATIERYKKAT 78
CsaSTK -----DAEVALIVFSSRGRLEYNN-S-----TKSTIERYKKAC 82
AtSTK -----DAEVALIVFSTRGRLEYNN-N-----IRSTIERYKKAC 99
QsSTK -----EAEVALIVFSSRGRLEYNN-S-----TKSTIERYKKAC 73
CmSTK -----EAEVALIVFSSRGRLEYNN-S-----TKSTIERYKKAC 73
JrSTK -----DAEVALIVFSSRGRLEYNN-N-----IKSTIERYKKAC 73
PpSTK -----DAEVALIVFSSRGRLEYNN-S-----IRSTIERYKKAC 74
MdSTK -----DAEVALIVFSTRGRLEYNN-S-----IRSTIERYKKAC 74
VvSTK -----DAEVALIVFSSRGRVVEYNN-N-----IKSTIERYKKAC 73
CsSTK -----DAEVALIVFSSRGRLEYNN-S-----IKSTIERYKKAC 73
MtSTK -----DAEVALIVFSSRGRLEYNN-N-----IRSTIERYKKAC 73
CuSTK -----DAEVALIVFSSRGRLEYNN-S-----IRSTIERYKKAC 74
PtSTK3 -----DAEVALIVFSSRGRLEYNN-S-----IRSTIERYKKAC 74
PtSTK1 -----DAEVALIVFSSRGRLEYNN-S-----IRSTIERYKKAC 74
PtSTK2 -----DAEVALIVFSSRGRLEYNN-N-----IRSTIERYKKAC 73
AtSHP1 -----DAEVALIVFSTRGRLEYNN-SFYLLEKKKKKKKKLWYSHVVGRTIERYKKAC 113
AtSHP2 -----DAEVALIVFSTRGRLEYNN-S-----VRGTIERYKKAC 88
MtSHP -----DAEVALIVFSTRGRLEYNN-S-----VRATIERYKKAC 88
PpSHP -----DAEVALIVFSTRGRLEYNN-S-----VRATIERYKKAC 88
MdSHP -----DAEVALIVFSTRGRLEYNN-S-----VRATIERYKKAC 88
AtAG -----DAEVALIVFSSRGRLEYNN-S-----VKGTIERYKKAC 89
SISHP -----DAEVALIVFSSRGRLEYNN-S-----VRATIERYKKAC 100
CuSHP -----DAEVALIVFSSRGRLEYNN-S-----VRATIERYKKAC 99
AmPLENA -----DAEVALIVFSSRGRLEYNN-S-----VRATIERYKKAC 86
CsaSHP -----DAEVALIVFSSRGRLEYNN-S-----VRGTINRYKKAC 88
CmSHP -----DAEVALIVFSSRGRLEYNN-S-----VRGTINRYKKAC 136
QsSHP1 -----DAEVALIVFSSRGRLEYNN-S-----VKGTINRYKKAC 93
QruSHP -----DAEVALIVFSSRGRLEYNN-S-----VRGTINRYKKAC 88
QsSHP2 -----DAEVALIVFSSRGRLEYNN-S-----VRGTINRYKKAC 93
AcSHP -----DAEVALIVFSSRGRLEYNN-S-----VRTIDRYKKAC 87
VvSHP -----DAEVALIVFSSRGRLEYNN-S-----VRTIDRYKKAC 93
CuAG -----DAEVALIVFSSRGRLEYNN-S-----VKSTIDRYKKAC 72
PtAG -----DAEVALIVFSSRGRLEYNN-S-----VKSTIDRYKKAC 78
VvAG -----DAEVALIVFSSRGRLEYNN-S-----VKSTIDRYKKAC 88
OsAG -----DAEVALIVFSSRGRLEYNN-S-----VKSTIDRYKKAC 113
ZmAG -----DAEVALIVFSSRGRLEYNN-S-----VKSTIDRYKKAC 105
PrAG -----DAEVALIVFSSRGRLEYNN-S-----VKSTIDRYKKAC 73
SIAG -----DAEVALIVFSSRGRLEYNN-S-----VKATIERYKKAC 89
AmFARINELLI -----DAEVALIVFSSRGRLEYNN-S-----VKATIDRYKKAC 89
AtrAG -----DAEVALIVFSSRGRLEYNN-S-----VKSTIDRYKKAC 73
MdAG -----DAEVALIVFSSRGRLEYNN-S-----VKGTIERYKKAC 89
PpAG -----DAEVALIVFSSRGRLEYNN-S-----VKGTIERYKKAC 89
CmAG -----DAEVALIVFSTRGRLEYNN-S-----VKSTIERYKKAC 88
QsAG -----DAEVALIVFSTRGRLEYNN-S-----VKSTIERYKKAC 88
CsaAG -----DAEVALIVFSSRGRLEYNN-S-----VKSTIERYKKAC 88
JrAG -----DAEVALIVFSSRGRLEYNN-S-----VKSTIDRYKKAC 88
BpAG -----DAEVALIVFSSRGRLEYNN-S-----VKSTIERYKKAC 89
CaAG -----DAEVALIVFSSRGRLEYNN-S-----VKSTIERYKKAC 89
CsAG -----DAEVALIVFSSRGRLEYNN-S-----VKATIDRYKKAC 89
GmAG -----DAEVALIVFSSRGRLEYNN-S-----VKATIERYKKAC 88
MtAG -----DAEVALIVFSSRGRLEYNN-S-----VKATIDRYKKAC 88

```



SISTK2 AETSNACTTQELNA---QFYQQESKKLRQIQIQQNSNRHLVGEGLSCLNVRELKQLENR 130  
 SISTK1 AETSNACTTQELNA---QFYQQESKKLRQIQIQQNSNRHLVGEGLSCLNVRELKQLENR 135  
 CsaSTK LDSSSETSSIAETNTQVNEYQQESAKLRLLIQNWDQCNRLHLEGEVNSLNSKDLQLESK 142  
 AtSTK SDSTNTSTVQETINA---AYYQQESAKLRQIQIQQNSNRHLVGEGLSCLNVRELKQLENR 156  
 QsSTK NDGSGTSSIAQINA---QYQQESAKLRQIQIQQNSNRHLVGEGLSCLNVRELKQLENR 130  
 CmSTK NDDSGTSSIAQINA---QYQQESAKLRQIQIQQNSNRHLVGEGLSCLNVRELKQLENR 130  
 JtSTK SDGSGTSSIAQINA---QYQQESAKLRQIQIQQNSNRHLVGEGLSCLNVRELKQLENR 130  
 PpSTK SDGSGTSSIAQINA---QYQQESAKLRQIQIQQNSNRHLVGEGLSCLNVRELKQLENR 131  
 MdSTK SDSTGSSSVTEINA---QYQQESAKLRQIQIQQNSNRHLVGEGLSCLNVRELKQLENR 131  
 VvSTK SDSTGSSSVTEINA---QYQQESAKLRQIQIQQNSNRHLVGEGLSCLNVRELKQLENR 130  
 CsSTK SDSSATSSSVTEINA---QYQQESAKLRQIQIQQNSNRHLVGEGLSCLNVRELKQLENR 130  
 MtSTK SDHSSSTTTTTEINA---QYQQESAKLRQIQIQQNSNRHLVGEGLSCLNVRELKQLENR 130  
 CuSTK SDNSNSTGTVTEINA---QYQQESAKLRQIQIQQNSNRHLVGEGLSCLNVRELKQLENR 131  
 PtSTK3 SDSSNSTGTVTEINA---QYQQESAKLRQIQIQQNSNRHLVGEGLSCLNVRELKQLENR 131  
 PtSTK1 SDSSNSTGTVTEINA---QYQQESAKLRQIQIQQNSNRHLVGEGLSCLNVRELKQLENR 131  
 PtSTK2 SDSSNSTGTVTEINA---QYQQESAKLRQIQIQQNSNRHLVGEGLSCLNVRELKQLENR 130  
 AtSHP1 SDAVNPPTSVEINA---QYQQESAKLRQIQIQQNSNRHLVGEGLSCLNVRELKQLENR 170  
 AtSHP2 SDAVNPPTSVEINA---QYQQESAKLRQIQIQQNSNRHLVGEGLSCLNVRELKQLENR 145  
 MtSHP AASTNAESVSEANA---QFYQQESAKLRQIQIQQNSNRHLVGEGLSCLNVRELKQLENR 145  
 PpSHP TOSTNGGSSVSEANA---QFYQQESAKLRQIQIQQNSNRHLVGEGLSCLNVRELKQLENR 145  
 MdSHP ADSTNGGSSVSEANA---QFYQQESAKLRQIQIQQNSNRHLVGEGLSCLNVRELKQLENR 145  
 AtAG SDNSNTGSSVSEANA---QFYQQESAKLRQIQIQQNSNRHLVGEGLSCLNVRELKQLENR 146  
 SiSHP ADSTNGGSSVSEANA---QFYQQESAKLRQIQIQQNSNRHLVGEGLSCLNVRELKQLENR 157  
 CuSHP ADSSNPPTSVEINA---QYQQESAKLRQIQIQQNSNRHLVGEGLSCLNVRELKQLENR 156  
 AmPLENA ADSSNPPTSVEINA---QYQQESAKLRQIQIQQNSNRHLVGEGLSCLNVRELKQLENR 143  
 CsaSHP TESSNPPTSVEINA---QYQQESAKLRQIQIQQNSNRHLVGEGLSCLNVRELKQLENR 145  
 CmSHP TESSNPPTSVEINA---QYQQESAKLRQIQIQQNSNRHLVGEGLSCLNVRELKQLENR 193  
 QsSHP1 TESSNPPTSVEINA---QYQQESAKLRQIQIQQNSNRHLVGEGLSCLNVRELKQLENR 150  
 QruSHP TESSNPPTSVEINA---QYQQESAKLRQIQIQQNSNRHLVGEGLSCLNVRELKQLENR 145  
 QsSHP2 TESSNPPTSVEINA---QYQQESAKLRQIQIQQNSNRHLVGEGLSCLNVRELKQLENR 150  
 AcSHP SDVLTNGSSVSEANA---QFYQQESAKLRQIQIQQNSNRHLVGEGLSCLNVRELKQLENR 144  
 VvSHP SDSSNSTGTVTEINA---QYQQESAKLRQIQIQQNSNRHLVGEGLSCLNVRELKQLENR 130  
 CuAG ADTSNTGSSVSEANA---QYQQESAKLRQIQIQQNSNRHLVGEGLSCLNVRELKQLENR 149  
 PtAG ADSSNSTGTVTEINA---QYQQESAKLRQIQIQQNSNRHLVGEGLSCLNVRELKQLENR 145  
 VvAG ADSSNSTGTVTEINA---QYQQESAKLRQIQIQQNSNRHLVGEGLSCLNVRELKQLENR 130  
 OsAG SDTSNSTGTVTEINA---QYQQESAKLRQIQIQQNSNRHLVGEGLSCLNVRELKQLENR 170  
 ZmAG SDSSNSTGTVTEINA---QYQQESAKLRQIQIQQNSNRHLVGEGLSCLNVRELKQLENR 162  
 PrAG VDNHNGGSSVSEANA---QYQQESAKLRQIQIQQNSNRHLVGEGLSCLNVRELKQLENR 130  
 SIAG SDSSNSTGTVTEINA---QYQQESAKLRQIQIQQNSNRHLVGEGLSCLNVRELKQLENR 146  
 AmFARINELLI SDSSNSTGTVTEINA---QYQQESAKLRQIQIQQNSNRHLVGEGLSCLNVRELKQLENR 146  
 AtAG ADSSNSTGTVSEANA---QYQQESAKLRQIQIQQNSNRHLVGEGLSCLNVRELKQLENR 130  
 MdAG ADSSNSTGTVSEANA---QYQQESAKLRQIQIQQNSNRHLVGEGLSCLNVRELKQLENR 146  
 PpAG AESTNTGSSVSEANA---QYQQESAKLRQIQIQQNSNRHLVGEGLSCLNVRELKQLENR 146  
 CmAG ADSSNSTGTVSEANA---QYQQESAKLRQIQIQQNSNRHLVGEGLSCLNVRELKQLENR 145  
 QsAG ADSSNSTGTVSEANA---QYQQESAKLRQIQIQQNSNRHLVGEGLSCLNVRELKQLENR 145  
 CsaAG ADSSNSTGTVSEANA---QYQQESAKLRQIQIQQNSNRHLVGEGLSCLNVRELKQLENR 145  
 JtAG ADSSNSTGTVSEANA---QYQQESAKLRQIQIQQNSNRHLVGEGLSCLNVRELKQLENR 145  
 BpAG AESSNSTGTVSEANA---QYQQESAKLRQIQIQQNSNRHLVGEGLSCLNVRELKQLENR 146  
 CaAG ADSSNSTGTVSEANA---QYQQESAKLRQIQIQQNSNRHLVGEGLSCLNVRELKQLENR 146  
 CsAG SDSSNSTGTVSEANA---QYQQESAKLRQIQIQQNSNRHLVGEGLSCLNVRELKQLENR 146  
 GmAG SDSSNSTGTVSEANA---QYQQESAKLRQIQIQQNSNRHLVGEGLSCLNVRELKQLENR 145  
 MtAG SDSSNSTGTVSEANA---QYQQESAKLRQIQIQQNSNRHLVGEGLSCLNVRELKQLENR 145

SISTK2 LERGIRSRKSKKHEMLAETENLQKR--EILLEQENAFLRSKIAENELDELMS---JP 184  
 SISTK1 LERGIRSRKSKKHEMLAETENLQKR--EILLEQENAFLRSKIAENELDELMS---JP 189  
 CsaSTK IVQGLVKIKSK-----K--VMELENEAYLAQVAEERLQKANS-----N 181  
 AtSTK LEKATSRKSKKHEMLLVEIENAKR--EILEDNENIYLRKVAEERYQHHH-----QM 210  
 QsSTK IEQGLTRKSKKHEMLLAEIYQKR--VMELENEVYLQAKIAEERLQVNL-----N 183  
 CmSTK IERGLTRKSKKHEMLLAEIYQKR--VMELENEVYLQAKIAEERLQVNL-----N 183  
 JtSTK LERGIRSRKSKKHEMLLAEIYQKR--EILEDNENIYLRKVAEERYQHHH-----QM 183  
 PpSTK LERGIRSRKSKKHEMLLAEIYQKR--EILEDNENIYLRKVAEERYQHHH-----QM 183  
 MdSTK LERGIRSRKSKKHEMLLAEIYQKR--EILEDNENIYLRKVAEERYQHHH-----QM 183  
 VvSTK LERGIRSRKSKKHEMLLAEIYQKR--EILEDNENIYLRKVAEERYQHHH-----QM 182  
 CsSTK LERGIRSRKSKKHEMLLAEIYQKR--EILEDNENIYLRKVAEERYQHHH-----QM 182  
 MtSTK LERGIRSRKSKKHEMLLAEIYQKR--EILEDNENIYLRKVAEERYQHHH-----QM 182  
 CuSTK LERGIRSRKSKKHEMLLAEIYQKR--EILEDNENIYLRKVAEERYQHHH-----QM 183  
 PtSTK3 LERGIRSRKSKKHEMLLAEIYQKR--EILEDNENIYLRKVAEERYQHHH-----QM 183  
 PtSTK1 LERGIRSRKSKKHEMLLAEIYQKR--EILEDNENIYLRKVAEERYQHHH-----QM 183  
 PtSTK2 LERGIRSRKSKKHEMLLAEIYQKR--EILEDNENIYLRKVAEERYQHHH-----QM 182  
 AtSHP1 LEKGISRVRSKKNELVAEIEYQKR--EILEDNENIYLRKVAEERYQHHH-----QM 226  
 AtSHP2 LEKGISRVRSKKNELVAEIEYQKR--EILEDNENIYLRKVAEERYQHHH-----QM 201  
 MtSHP LEKGLSRVRSKKNELVAEIEYQKR--EILEDNENIYLRKVAEERYQHHH-----QM 199  
 PpSHP LEKGLSRVRSKKNELVAEIEYQKR--EILEDNENIYLRKVAEERYQHHH-----QM 198  
 MdSHP LEKGLSRVRSKKNELVAEIEYQKR--EILEDNENIYLRKVAEERYQHHH-----QM 199  
 AtAG LEKATSRKSKKHEMLLAEIYQKR--EILEDNENIYLRKVAEERYQHHH-----QM 199  
 SiSHP LEKATSRVRSKKNELVAEIEYQKR--EILEDNENIYLRKVAEERYQHHH-----QM 210  
 CuSHP LEKATSRVRSKKNELVAEIEYQKR--EILEDNENIYLRKVAEERYQHHH-----QM 214  
 AmPLENA VEGATSRVRSKKNELVAEIEYQKR--EILEDNENIYLRKVAEERYQHHH-----QM 196  
 CsaSHP LEKATSRVRSKKNELVAEIEYQKR--EILEDNENIYLRKVAEERYQHHH-----QM 200  
 CmSHP LEKATSRVRSKKNELVAEIEYQKR--EILEDNENIYLRKVAEERYQHHH-----QM 248  
 QsSHP1 LEKATSRVRSKKNELVAEIEYQKR--EILEDNENIYLRKVAEERYQHHH-----QM 205  
 QruSHP LEKATSRVRSKKNELVAEIEYQKR--EILEDNENIYLRKVAEERYQHHH-----QM 200  
 QsSHP2 LEKATSRVRSKKNELVAEIEYQKR--EILEDNENIYLRKVAEERYQHHH-----QM 205  
 AcSHP LEKATSRVRSKKNELVAEIEYQKR--EILEDNENIYLRKVAEERYQHHH-----QM 197  
 VvSHP LEKATSRVRSKKNELVAEIEYQKR--EILEDNENIYLRKVAEERYQHHH-----QM 183  
 CuAG LEKATSRVRSKKNELVAEIEYQKR--EILEDNENIYLRKVAEERYQHHH-----QM 202  
 PtAG LEKATSRVRSKKNELVAEIEYQKR--EILEDNENIYLRKVAEERYQHHH-----QM 198  
 VvAG LEKATSRVRSKKNELVAEIEYQKR--EILEDNENIYLRKVAEERYQHHH-----QM 183  
 OsAG LEKATSRVRSKKNELVAEIEYQKR--EILEDNENIYLRKVAEERYQHHH-----QM 225  
 ZmAG LEKATSRVRSKKNELVAEIEYQKR--EILEDNENIYLRKVAEERYQHHH-----QM 219  
 PrAG LEKATSRVRSKKNELVAEIEYQKR--EILEDNENIYLRKVAEERYQHHH-----QM 182  
 SIAG LEKATSRVRSKKNELVAEIEYQKR--EILEDNENIYLRKVAEERYQHHH-----QM 202  
 AmFARINELLI LERGIRSRKSKKHEMLLAEIYQKR--EILEDNENIYLRKVAEERYQHHH-----QM 201  
 AtAG LEKATSRVRSKKNELVAEIEYQKR--EILEDNENIYLRKVAEERYQHHH-----QM 182  
 MdAG LEKATSRVRSKKNELVAEIEYQKR--EILEDNENIYLRKVAEERYQHHH-----QM 199  
 PpAG LEKATSRVRSKKNELVAEIEYQKR--EILEDNENIYLRKVAEERYQHHH-----QM 199  
 CmAG LEKATSRVRSKKNELVAEIEYQKR--EILEDNENIYLRKVAEERYQHHH-----QM 198  
 QsAG LEKATSRVRSKKNELVAEIEYQKR--EILEDNENIYLRKVAEERYQHHH-----QM 198  
 CsaAG LEKATSRVRSKKNELVAEIEYQKR--EILEDNENIYLRKVAEERYQHHH-----QM 198  
 JtAG LEKATSRVRSKKNELVAEIEYQKR--EILEDNENIYLRKVAEERYQHHH-----QM 198  
 BpAG LEKATSRVRSKKNELVAEIEYQKR--EILEDNENIYLRKVAEERYQHHH-----QM 199  
 CaAG LEKATSRVRSKKNELVAEIEYQKR--EILEDNENIYLRKVAEERYQHHH-----QM 199  
 CsAG LEKATSRVRSKKNELVAEIEYQKR--EILEDNENIYLRKVAEERYQHHH-----QM 197  
 GmAG LEKATSRVRSKKNELVAEIEYQKR--EILEDNENIYLRKVAEERYQHHH-----QM 198  
 MtAG LEKATSRVRSKKNELVAEIEYQKR--EILEDNENIYLRKVAEERYQHHH-----QM 203



D

|          |                                                             |     |
|----------|-------------------------------------------------------------|-----|
| AtSEP1   | -MGRGRVELKRIENKINRQVTFAKRRNGLKKAYELSVLCOAEVALIIFSNRGKLYEFC  | 59  |
| AtSEP2   | -MGRGRVELKRIENKINRQVTFAKRRNGLKKAYELSVLCOAEVSLIVFSNRGKLYEFC  | 59  |
| MdSEP1   | -MGRGRVELKRIENKINRQVTFAKRRNGLKKAYELSVLCOAEVALIIFSNRGKLYEFC  | 59  |
| PpSEP1.3 | -MGRGRVELKRIENKINRQVTFAKRRNGLKKAYELSVLCOAEVALIIFSNRGKLYEFC  | 59  |
| PpSEP1.2 | -MGRGRVELKRIENKINRQVTFAKRRNGLKKAYELSVLCOAEVALIIFSNRGKLYEFC  | 59  |
| PpSEP1.4 | -MGRGRVELKRIENKINRQVTFAKRRNGLKKAYELSVLCOAEVALIIFSNRGKLYEFC  | 59  |
| PpSEP1.1 | -MGRGRVELKRIENKINRQVTFAKRRNGLKKAYELSVLCOAEVALIIFSNRGKLYEFC  | 59  |
| MtSEP1.2 | -MGRGRVELKRIENKINRQVTFAKRRNGLKKAYELSVLCOAEVALIIFSTRGKLYEFC  | 59  |
| JrSEP1   | -MGRGRVELKRIENKINRQVTFAKRRNGLKKAYELSVLCOAEVALIIFSNRGKLYEFC  | 59  |
| QsSEP1   | -MGRGRVELKRIENKINRQVTFAKRRNGLKKAYELSVLCOAEVALIIFSNRGKLYEFC  | 59  |
| CmSEP1   | -MGRGRVELKRIENKINRQVTFAKRRNGLKKAYELSVLCOAEVALIIFSNRGKLYEFC  | 59  |
| CsaSEP1  | -MGRGRVELKRIENKINRQVTFAKRRNGLKKAYELSVLCOAEVALIIFSNRGKLYEFC  | 59  |
| GmSEP1   | -MGRGRVELKRIENKINRQVTFAKRRNGLKKAYELSVLCOAEVALIIFSTRGKLYEFC  | 59  |
| MtSEP1.1 | -MGRGRVELKRIENKINRQVTFAKRRNGLKKAYELSVLCOAEVALIIFSNRGKLYEFC  | 59  |
| QrSEP3   | -MGRGRVELKRIENKINRQVTFAKRRNGLKKAYELSVLCOAEVALIIFSNRGKLYEFC  | 58  |
| QsSEP3   | -MGRGRVELKRIENKINRQVTFAKRRNGLKKAYELSVLCOAEVALIIFSNRGKLYEFC  | 59  |
| CmSEP3   | -MGRGRVELKRIENKINRQVTFAKRRNGLKKAYELSVLCOAEVALIIFSNRGKLYEFC  | 59  |
| CsaSEP3  | -MGRGRVELKRIENKINRQVTFAKRRNGLKKAYELSVLCOAEVALIIFSNRGKLYEFC  | 59  |
| BpSEP3   | -MGRGRVELKRIENKINRQVTFAKRRNGLKKAYELSVLCOAEVALIIFSNRGKLYEFC  | 59  |
| JrSEP3   | -MGRGRVELKRIENKINRQVTFAKRRNGLKKAYELSVLCOAEVALIIFSNRGKLYEFC  | 59  |
| AcSEP3.1 | -MGRGRVELKRIENKINRQVTFAKRRNGLKKAYELSVLCOAEVALIIFSNRGKLYEFC  | 59  |
| CuSEP3   | MARGGRVELKRIENKINRQVTFAKRRNGLKKAYELSVLCOAEVALIIFSNRGKLYEFC  | 60  |
| MdSEP3   | -MGRGRVELKRIENKINRQVTFAKRRNGLKKAYELSVLCOAEVALIIFSNRGKLYEFC  | 59  |
| PpSEP3   | -MGRGRVELKRIENKINRQVTFAKRRNGLKKAYELSVLCOAEVALIIFSNRGKLYEFC  | 59  |
| PtSEP3   | -MGRGRVELKRIENKINRQVTFAKRRNGLKKAYELSVLCOAEVALIIFSNRGKLYEFC  | 59  |
| SiSEP3   | -MGRGRVELKRIENKINRQVTFAKRRNGLKKAYELSVLCOAEVALIIFSNRGKLYEFC  | 59  |
| AcSEP3.2 | -MGRGRVELKRIENKINRQVTFAKRRNGLKKAYELSVLCOAEVALIIFSNRGKLYEFC  | 59  |
| AcSEP3.3 | -MGRGRVELKRIENKINRQVTFAKRRNGLKKAYELSVLCOAEVALIIFSNRGKLYEFC  | 59  |
| VvSEP3   | -MGRGRVELKRIENKINRQVTFAKRRNGLKKAYELSVLCOAEVALIIFSNRGKLYEFC  | 59  |
| CsSEP3   | -MGRGRVELKRIENKINRQVTFAKRRNGLKKAYELSVLCOAEVALIIFSNRGKLYEFC  | 59  |
| AtSEP4   | -MGRGRVELKRIENKINRQVTFAKRRNGLKKAYELSVLCOAEVALIIFSNRGKLYEFC  | 59  |
| QrSEP4   | -MGRGRVELKRIENKINRQVTFAKRRNGLKKAYELSVLCOAEVALIIFSNRGKLYEFC  | 59  |
| QsSEP4   | ---RVELKRIENKINRQVTFAKRRNGLKKAYELSVLCOAEVALIIFSNRGKLYEFC    | 55  |
| CmSEP4.2 | -MGRGRVELKRIENKINRQVTFAKRRNGLKKAYELSVLCOAEVALIIFSNRGKLYEFC  | 59  |
| CmSEP4.1 | -MGRGRVELKRIENKINRQVTFAKRRNGLKKAYELSVLCOAEVALIIFSNRGKLYEFC  | 59  |
| CsaSEP4  | -----                                                       | 0   |
| AcSEP1   | -MGRGRVELKRIENKINRQVTFAKRRNGLKKAYELSVLCOAEVALIIFSNRGKLYEFC  | 59  |
| AcSEP2   | -MGRGRVELKRIENKINRQVTFAKRRNGLKKAYELSVLCOAEVALIIFSNRGKLYEFC  | 59  |
| CsSEP2   | -MGRGRVELKRIENKINRQVTFAKRRNGLKKAYELSVLCOAEVALIIFSNRGKLYEFC  | 59  |
| PrSEP3   | -MGRGRVELKRIENKINRQVTFAKRRNGLKKAYELSVLCOAEVALIIFSNRGKLYEFC  | 59  |
| OsSEP3   | -MGRGRVELKRIENKINRQVTFAKRRNGLKKAYELSVLCOAEVALIIFSNRGKLYEFC  | 59  |
| SiSEP1   | -MGRGRVELKRIENKINRQVTFAKRRNGLKKAYELSVLCOAEVALIIFSNRGKLYEFC  | 59  |
| AtSEP3   | -MGRGRVELKRIENKINRQVTFAKRRNGLKKAYELSVLCOAEVALIIFSNRGKLYEFC  | 59  |
| SiSEP3   | -MGRGRVELKRIENKINRQVTFAKRRNGLKKAYELSVLCOAEVALIIFSNRGKLYEFC  | 59  |
| PtSEP1   | -MGRGRVELKRIENKINRQVTFAKRRNGLKKAYELSVLCOAEVALIIFSNRGKLYEFC  | 59  |
| VvSEP3   | -MGRGRVELKRIENKINRQVTFAKRRNGLKKAYELSVLCOAEVALIIFSTRGKLYEFC  | 59  |
| AtSEP3   | -MGRGRVELKRIENKINRQVTFAKRRNGLKKAYELSVLCOAEVALIIFSNRGKLYEFC  | 59  |
| CuSEP1   | -MGRGRVELKRIENKINRQVTFAKRRNGLKKAYELSVLCOAEVALIIFSNRGKLYEFC  | 59  |
| PrSEP1   | -MGRGRVELKRIENKINRQVTFAKRRNGLKKAYELSVLCOAEVALIIFSNRGKLYEFC  | 59  |
| CsaSEP2  | -MGRGRVELKRIENKINRQVTFAKRRNGLKKAYELSVLCOAEVALIIFSNRGKLYEFC  | 59  |
| CmSEP2   | -MGRGRVELKRIENKINRQVTFAKRRNGLKKAYELSVLCOAEVALIIFSNRGKLYEFC  | 59  |
| AtSEP1   | SS-IMPLKTLDRYQKCSYGSIE-VNNKPAKE---LE-MSYREYLKLGRYENLQQRNLL  | 113 |
| AtSEP2   | TS-IMPLKTLDRYQKCSYGSIE-VNNKPAKE---LE-MSYREYLKLGRYENLQQRNLL  | 113 |
| MdSEP1   | SS-SILKTLDRYQKCSYGAVD-QVNNKPAKE---L-ESSYREYLKLGRYENLQQRNLL  | 113 |
| PpSEP1.3 | SS-SILKTLDRYQKCSYGVQE-V-NKPAKE---LE-SSYREYLKLGRYENLQQRNLL   | 112 |
| PpSEP1.2 | SS-SILKTLDRYQKCSYGVQE-V-NKPAKE---LEQSSYREYLKLGRYENLQQRNLL   | 113 |
| PpSEP1.4 | SSSILKTLDRYQKCSYGVQE-V-NKPAKE---LE-SSYREYLKLGRYENLQQRNLL    | 113 |
| PpSEP1.1 | SSSILKTLDRYQKCSYGVQE-V-NKPAKE---LEQSSYREYLKLGRYENLQQRNLL    | 114 |
| MtSEP1.2 | TS-IMPLKTLDRYQKCSYGA-V-EVSKPAKE---LE-SSYREYLKLGRYENLQQRNLL  | 112 |
| JrSEP1   | SS-SMLKTLDRYQKCSYGTAV-EVNNKPAKE---LEQSSYREYLKLGRYENLQQRNLL  | 114 |
| QsSEP1   | TS-SMLKTLDRYQKCSYGA-V-EVNNKPAKE---LE-SSYREYLKLGRYENLQQRNLL  | 112 |
| CmSEP1   | TS-SMLKTLDRYQKCSYGA-V-EVNNKPAKE---LE-SSYREYLKLGRYENLQQRNLL  | 112 |
| CsaSEP1  | TS-SMLKTLDRYQKCSYGA-V-EVNNKPAKE---LE-SSYREYLKLGRYENLQQRNLL  | 112 |
| GmSEP1   | TN-SMLKTLDRYQKCSYGA-V-EVSKPAKE---LE-SSYREYLKLGRYENLQQRNLL   | 112 |
| MtSEP1.1 | SP-SMLKTLDRYQKCSYGA-V-EVNNKPAKE---LEQSSYREYLKLGRYENLQQRNLL  | 113 |
| QrSEP3   | ---SMLKTLDRYQKCSYGA-V-EVNNKPAKE---LEQSSYREYLKLGRYENLQQRNLL  | 111 |
| QsSEP3   | T-SMLKTLDRYQKCSYGA-V-EVNNKPAKE---LEQSSYREYLKLGRYENLQQRNLL   | 114 |
| CmSEP3   | T-SMLKTLDRYQKCSYGA-V-EVNNKPAKE---LEQSSYREYLKLGRYENLQQRNLL   | 114 |
| CsaSEP3  | T-SMLKTLDRYQKCSYGA-V-EVNNKPAKE---LEQSSYREYLKLGRYENLQQRNLL   | 114 |
| BpSEP3   | S-SMLKTLDRYQKCSYGA-V-EVNNKPAKE---LEQSSYREYLKLGRYENLQQRNLL   | 114 |
| JrSEP3   | S-SMLKTLDRYQKCSYGA-V-EVNNKPAKE---LEQSSYREYLKLGRYENLQQRNLL   | 116 |
| AcSEP3.1 | T-SMLKTLDRYQKCSYGA-V-EVNNKPAKE---LEQSSYREYLKLGRYENLQQRNLL   | 114 |
| CuSEP3   | S-SMLKTLDRYQKCSYGA-V-EVNNKPAKE---LEQSSYREYLKLGRYENLQQRNLL   | 115 |
| MdSEP3   | S-SMLKTLDRYQKCSYGA-V-EVNNKPAKE---LEQSSYREYLKLGRYENLQQRNLL   | 114 |
| PpSEP3   | S-SMLKTLDRYQKCSYGA-V-EVNNKPAKE---LEQSSYREYLKLGRYENLQQRNLL   | 114 |
| PtSEP3   | S-SMLKTLDRYQKCSYGA-V-EVNNKPAKE---LEQSSYREYLKLGRYENLQQRNLL   | 114 |
| SiSEP3   | S-SMLKTLDRYQKCSYGA-V-EVNNKPAKE---LEQSSYREYLKLGRYENLQQRNLL   | 114 |
| AcSEP3.2 | T-SMLKTLDRYQKCSYGA-V-EVNNKPAKE---LEQSSYREYLKLGRYENLQQRNLL   | 114 |
| AcSEP3.3 | T-SMLKTLDRYQKCSYGA-V-EVNNKPAKE---LEQSSYREYLKLGRYENLQQRNLL   | 114 |
| VvSEP3   | S-SMLKTLDRYQKCSYGA-V-EVNNKPAKE---LEQSSYREYLKLGRYENLQQRNLL   | 114 |
| CsSEP3   | S-SMLKTLDRYQKCSYGA-V-EVNNKPAKE---LEQSSYREYLKLGRYENLQQRNLL   | 114 |
| AtSEP4   | SPSGHARTVDKYRKHSYATMD-PNQSAPKD---L-QDKYQDYLLKSRVEILQHSQRNLL | 113 |
| QrSEP4   | ---MARTLEKYQRCYSATLE-ANQPAKD---TQ-SSYQDYLLKAKAEALQHTQRNLL   | 108 |
| QsSEP4   | S-PSMAGTLEKYQRCYSATLE-ANQPAKD---TQ-SSYQDYLLKAKAEALQHTQRNLL  | 109 |
| CmSEP4.2 | S-PSMAGTLEKYQRCYSATLE-ANQPAKD---TQ-SSYQDYLLKAKAEALQHTQRNLL  | 113 |
| CmSEP4.1 | S-PSMAGTLEKYQRCYSATLE-ANQPAKD---TQ-SSYQDYLLKAKAEALQHTQRNLL  | 112 |
| CsaSEP4  | ---MARTLEKYQRCYSATLE-ANQPAKD---TQ-SSYQDYLLKAKAEALQHTQRNLL   | 50  |
| AcSEP1   | T-SMMLKTLDRYQKCSYDLE-VNHSDE---LEQSSYREYLKLGRYENLQQRNLL      | 113 |
| AcSEP2   | T-SMMLKTLDRYQKCSYDLE-VNHSDE---LEQSSYREYLKLGRYENLQQRNLL      | 113 |
| CsSEP2   | G-SMMLKTLDRYQKCSYDLE-VNHSDE---LEQSSYREYLKLGRYENLQQRNLL      | 113 |
| PrSEP3   | ---AGMLKTLDRYQKCSYDLE-VNHSDE---LEQSSYREYLKLGRYENLQQRNLL     | 111 |
| QsSEP3   | T-QSMMLKTLDRYQKCSYDLE-VNHSDE---LEQSSYREYLKLGRYENLQQRNLL     | 115 |
| SiSEP1   | T-SMMLKTLDRYQKCSYDLE-VNHSDE---LEQSSYREYLKLGRYENLQQRNLL      | 113 |
| AtSEP3   | S-SMMLKTLDRYQKCSYDLE-VNHSDE---LEQSSYREYLKLGRYENLQQRNLL      | 116 |
| SiSEP3   | T-SMMLKTLDRYQKCSYDLE-VNHSDE---LEQSSYREYLKLGRYENLQQRNLL      | 112 |
| VvSEP3   | T-SMMLKTLDRYQKCSYDLE-VNHSDE---LEQSSYREYLKLGRYENLQQRNLL      | 113 |
| AtSEP3   | T-SMMLKTLDRYQKCSYDLE-VNHSDE---LEQSSYREYLKLGRYENLQQRNLL      | 112 |
| CuSEP1   | S-SMMLKTLDRYQKCSYDLE-VNHSDE---LEQSSYREYLKLGRYENLQQRNLL      | 112 |
| PrSEP1   | S-SMMLKTLDRYQKCSYDLE-VNHSDE---LEQSSYREYLKLGRYENLQQRNLL      | 112 |
| CsaSEP2  | S-SMMLKTLDRYQKCSYDLE-VNHSDE---LEQSSYREYLKLGRYENLQQRNLL      | 112 |
| CmSEP2   | S-SMMLKTLDRYQKCSYDLE-VNHSDE---LEQSSYREYLKLGRYENLQQRNLL      | 112 |

|          |                                                             |     |
|----------|-------------------------------------------------------------|-----|
| AtSEP1   | GEDGLPLNSKELEQLERQDGLSKQVRSIKTQYHLDQLSDLNKEQHILLETNRALAHKLD | 173 |
| AtSEP2   | GEDGLPLNSKELEQLERQDGLSKQVRSIKTQYHLDQLSDLNKEQHILLETNRALAHKLD | 173 |
| MdSEP1   | GEDGLPLNTKELEQLERQDGLSKQVRSIKTQYHLDQLSDLNKEQHILLETNRALAHKLD | 173 |
| PpSEP1.3 | GEDGLPLNTKELEQLERQDGLSKQVRSIKTQYHLDQLSDLNKEQHILLETNRALAHKLD | 172 |
| PpSEP1.2 | GEDGLPLNTKELEQLERQDGLSKQVRSIKTQYHLDQLSDLNKEQHILLETNRALAHKLD | 173 |
| PpSEP1.4 | GEDGLPLNTKELEQLERQDGLSKQVRSIKTQYHLDQLSDLNKEQHILLETNRALAHKLD | 173 |
| MtSEP1.1 | GEDGLPLNTKELEQLERQDGLSKQVRSIKTQYHLDQLSDLNKEQHILLETNRALAHKLD | 174 |
| MtSEP1.2 | GEDGLPLNTKELEQLERQDGLSKQVRSIKTQYHLDQLSDLNKEQHILLETNRALAHKLD | 172 |
| JrSEP1   | GEDGLPLNTDLEQLERQDGLSKQVRSIKTQYHLDQLSDLNKEQHILLETNRALAHKLD  | 174 |
| QsSEP1   | GEDGLPLNTDLEQLERQDGLSKQVRSIKTQYHLDQLSDLNKEQHILLETNRALAHKLD  | 172 |
| CmSEP1   | GEDGLPLNTDLEQLERQDGLSKQVRSIKTQYHLDQLSDLNKEQHILLETNRALAHKLD  | 172 |
| CsaSEP1  | GEDGLPLNTDLEQLERQDGLSKQVRSIKTQYHLDQLSDLNKEQHILLETNRALAHKLD  | 172 |
| GmSEP1   | GEDGLPLNTDLEQLERQDGLSKQVRSIKTQYHLDQLSDLNKEQHILLETNRALAHKLD  | 172 |
| MtSEP1.1 | GEDGLPLNTDLEQLERQDGLSKQVRSIKTQYHLDQLSDLNKEQHILLETNRALAHKLD  | 172 |
| QsSEP1   | GEDGLPLNTDLEQLERQDGLSKQVRSIKTQYHLDQLSDLNKEQHILLETNRALAHKLD  | 173 |
| QsSEP3   | GEDGLPLSSKELEQLERQDGLSKQVRSIKTQYHLDQLSDLNKEQHILLETNRALAHKLD | 171 |
| CmSEP3   | GEDGLPLSSKELEQLERQDGLSKQVRSIKTQYHLDQLSDLNKEQHILLETNRALAHKLD | 174 |
| CsaSEP3  | GEDGLPLSSKELEQLERQDGLSKQVRSIKTQYHLDQLSDLNKEQHILLETNRALAHKLD | 174 |
| BpSEP3   | GEDGLPLSSKELEQLERQDGLSKQVRSIKTQYHLDQLSDLNKEQHILLETNRALAHKLD | 174 |
| JrSEP3   | GEDGLPLSSKELEQLERQDGLSKQVRSIKTQYHLDQLSDLNKEQHILLETNRALAHKLD | 176 |
| AcSEP3.1 | GEDGLPLSSKELEQLERQDGLSKQVRSIKTQYHLDQLSDLNKEQHILLETNRALAHKLD | 174 |
| CuSEP3   | GEDGLPLSSKELEQLERQDGLSKQVRSIKTQYHLDQLSDLNKEQHILLETNRALAHKLD | 175 |
| MdSEP3   | GEDGLPLSSKELEQLERQDGLSKQVRSIKTQYHLDQLSDLNKEQHILLETNRALAHKLD | 174 |
| PpSEP3   | GEDGLPLSSKELEQLERQDGLSKQVRSIKTQYHLDQLSDLNKEQHILLETNRALAHKLD | 174 |
| PtSEP3   | GEDGLPLSSKELEQLERQDGLSKQVRSIKTQYHLDQLSDLNKEQHILLETNRALAHKLD | 174 |
| SiSEP3   | GEDGLPLSSKELEQLERQDGLSKQVRSIKTQYHLDQLSDLNKEQHILLETNRALAHKLD | 174 |
| AcSEP3.2 | GEDGLPLSSKELEQLERQDGLSKQVRSIKTQYHLDQLSDLNKEQHILLETNRALAHKLD | 174 |
| AcSEP3.3 | GEDGLPLSSKELEQLERQDGLSKQVRSIKTQYHLDQLSDLNKEQHILLETNRALAHKLD | 174 |
| VvSEP3   | GEDGLPLSSKELEQLERQDGLSKQVRSIKTQYHLDQLSDLNKEQHILLETNRALAHKLD | 174 |
| CsSEP3   | GEDGLPLSSKELEQLERQDGLSKQVRSIKTQYHLDQLSDLNKEQHILLETNRALAHKLD | 174 |
| QsSEP4   | GEDGLPLSSKELEQLERQDGLSKQVRSIKTQYHLDQLSDLNKEQHILLETNRALAHKLD | 173 |
| QsSEP4   | GEDGLPLSSKELEQLERQDGLSKQVRSIKTQYHLDQLSDLNKEQHILLETNRALAHKLD | 168 |
| CmSEP4.2 | GEDGLPLSSKELEQLERQDGLSKQVRSIKTQYHLDQLSDLNKEQHILLETNRALAHKLD | 173 |
| CmSEP4.1 | GEDGLPLSSKELEQLERQDGLSKQVRSIKTQYHLDQLSDLNKEQHILLETNRALAHKLD | 172 |
| CsaSEP4  | GEDGLPLSSKELEQLERQDGLSKQVRSIKTQYHLDQLSDLNKEQHILLETNRALAHKLD | 110 |
| AcSEP1   | GEDGLPLNINELEHLEQLDGLSKQVRSIKTQYHLDQLSDLNKEQHILLETNRALAHKLD | 173 |
| AcSEP2   | GEDGLPLNINELEHLEQLDGLSKQVRSIKTQYHLDQLSDLNKEQHILLETNRALAHKLD | 173 |
| CsSEP2   | GEDGLPLNINELEHLEQLDGLSKQVRSIKTQYHLDQLSDLNKEQHILLETNRALAHKLD | 173 |
| PtSEP3   | GEDGLPLSSKELEQLERQDGLSKQVRSIKTQYHLDQLSDLNKEQHILLETNRALAHKLD | 171 |
| OsSEP3   | GEDGLPLSSKELEQLERQDGLSKQVRSIKTQYHLDQLSDLNKEQHILLETNRALAHKLD | 175 |
| SiSEP1   | GEDGLPLSSKELEQLERQDGLSKQVRSIKTQYHLDQLSDLNKEQHILLETNRALAHKLD | 173 |
| AtSEP3   | GEDGLPLSSKELEQLERQDGLSKQVRSIKTQYHLDQLSDLNKEQHILLETNRALAHKLD | 176 |
| SiSEP3   | GEDGLPLSSKELEQLERQDGLSKQVRSIKTQYHLDQLSDLNKEQHILLETNRALAHKLD | 172 |
| VvSEP1   | GEDGLPLNTKELEQLERQDGLSKQVRSIKTQYHLDQLSDLNKEQHILLETNRALAHKLD | 172 |
| VvSEP3   | GEDGLPLNTKELEQLERQDGLSKQVRSIKTQYHLDQLSDLNKEQHILLETNRALAHKLD | 173 |
| AtSEP3   | GEDGLPLSSKELEQLERQDGLSKQVRSIKTQYHLDQLSDLNKEQHILLETNRALAHKLD | 172 |
| CuSEP1   | GEDGLPLSSKELEQLERQDGLSKQVRSIKTQYHLDQLSDLNKEQHILLETNRALAHKLD | 172 |
| PtSEP1   | GEDGLPLSSKELEQLERQDGLSKQVRSIKTQYHLDQLSDLNKEQHILLETNRALAHKLD | 172 |
| CsaSEP2  | GEDGLPLSSKELEQLERQDGLSKQVRSIKTQYHLDQLSDLNKEQHILLETNRALAHKLD | 119 |
| CmSEP2   | GEDGLPLSSKELEQLERQDGLSKQVRSIKTQYHLDQLSDLNKEQHILLETNRALAHKLD | 172 |

\*\*\*

|          |                                                           |     |
|----------|-----------------------------------------------------------|-----|
| AtSEP1   | DMHIGVR-SHHMGGGGGEGGE-Q-N-----VTVAH--H---QAQSQGLVQPLEC    | 214 |
| AtSEP2   | DMHIGVR-SHHMGGGGGEGGE-Q-N-----VTVAH--H---QAQSQGLVQPLEC    | 213 |
| MdSEP1   | EI--SS-RNQL--RQSWEGGQDQ-----MAYATQH--HAQSQGFQPLDC         | 212 |
| PpSEP1.3 | DI--SS-RNQL--RQSWEGGQDQ-G-----MAYG--SQ---HAQSQGFQPLDC     | 210 |
| PpSEP1.2 | DI--SS-RNQL--RQSWEGGQDQ-G-----MAYG--SQ---HAQSQGFQPLDC     | 211 |
| PpSEP1.4 | DI--SS-RNQL--RQSWEGGQDQ-G-----MAYG--SQ---HAQSQGFQPLDC     | 211 |
| PpSEP1.1 | DI--SS-RNQL--RQSWEGGQDQ-G-----MAYG--SQ---HAQSQGFQPLDC     | 212 |
| MtSEP1.2 | EI--NS-RNHV--RQSWEGGQDQ-----MAYEAQ-Q---NAHSQSFQPLEC       | 210 |
| JrSEP1   | EI--CS-RNHL--RQSWEGGQDQ-----MAYG--Q---NPQTGFQPLDC         | 211 |
| QsSEP1   | EI--SS-RNHL--RQSWEGGQDQ-----MAYG--Q---NAHSQSFQPLDC        | 209 |
| CmSEP1   | EI--SS-RNHL--RQSWEGGQDQ-----MAYG--Q---NAHSQSFQPLDC        | 209 |
| GmSEP1   | EI--SS-RNHL--RQSWEGGQDQ-----MAYG--Q---NAHSQSFQPLDC        | 209 |
| CsaSEP1  | EI--NS-RNHV--RQSWEGGQDQ-----MAYG--Q---NAHSQSFQPLDC        | 209 |
| MtSEP1.1 | ETINIS-RNHV--RQSWEGGQDQ-----MAYG--Q---NAHSQSFQPLDC        | 212 |
| QsSEP3   | EGYEL-----QLNPSVN-D-----MAYGRQA--QP--QSDFFHPLDC           | 204 |
| CsSEP3   | EGYEL-----QLNPSVN-D-----MAYGRQA--QP--QSDFFHPLDC           | 207 |
| CmSEP3   | EGYEL-----QLNPSVN-D-----MAYGRQA--QP--QSDFFHPLDC           | 207 |
| CsaSEP3  | EGYEL-----QLNPSVN-D-----MAYGRQA--QP--QSDFFHPLDC           | 207 |
| BpSEP3   | DGYHI-----DTVLQDQSA-ND-----MAYGRQA--QP--QSDFFHPLDC        | 211 |
| JrSEP3   | EGYHI-----DTVLQDQSA-ND-----MAYGRQA--QP--QSDFFHPLDC        | 213 |
| AcSEP3.1 | GDSQV-----DTVLQDQSA-ND-----MAYGRQA--QP--QSDFFHPLDC        | 213 |
| CuSEP3   | EGYQV-----DTVLQDQSA-ND-----MAYGRQA--QP--QSDFFHPLDC        | 212 |
| MdSEP3   | EGYHA-----DTVLQDQSA-ND-----MAYGRQA--QP--QSDFFHPLDC        | 208 |
| PpSEP3   | EGYHV-----DTVLQDQSA-ND-----MAYGRQA--QP--QSDFFHPLDC        | 209 |
| PtSEP3   | EGYQL-----DTVLQDQSA-ND-----MAYGRQA--QP--QSDFFHPLDC        | 211 |
| SiSEP3   | EGSQV-----DTVLQDQSA-ND-----MAYGRQA--QP--QSDFFHPLDC        | 210 |
| AcSEP3.2 | EGSQV-----DTVLQDQSA-ND-----MAYGRQA--QP--QSDFFHPLDC        | 212 |
| AcSEP3.3 | EGSQV-----DTVLQDQSA-ND-----MAYGRQA--QP--QSDFFHPLDC        | 211 |
| VvSEP3   | EGTQV-----DTVLQDQSA-ND-----MAYGRQA--QP--QSDFFHPLDC        | 211 |
| CsSEP3   | EGYQV-----DTVLQDQSA-ND-----MAYGRQA--QP--QSDFFHPLDC        | 211 |
| AtSEP4   | DSDA-----DTVLQDQSA-ND-----MAYGRQA--QP--QSDFFHPLDC         | 222 |
| QsSEP4   | EGNAA-----LQSTWEAREK--N-----VPYSCNP-----QEEFFQPLRC        | 168 |
| CmSEP4.2 | EGNAV-----LQSTWEAREK--N-----VPYSCNP-----QEEFFQPLRC        | 208 |
| CmSEP4.1 | EGNAV-----LQSTWEAREK--N-----VPYSCNP-----QEEFFQPLRC        | 207 |
| CsaSEP4  | EGKAV-----LQSTWEAREK--N-----VPYSCNP-----QEEFFQPLRC        | 145 |
| AcSEP1   | EIYR-----ENHFRSWSAGC-E-QC-----SSVPQNI-----AQSQVFFQPLDC    | 210 |
| AcSEP2   | EIYR-----ENHFRSWSAGC-E-QC-----SSVPQNI-----AQSQVFFQPLDC    | 211 |
| CsSEP2   | ESSAQ-VAAAGAGAGVIEDAGSHI-----HVPYSG-----VASQDAFFHPLDC     | 218 |
| PtSEP3   | EAEQA-FNAVQPPHAGSHAV-AH-----HAYVQHP-----SHAVDC            | 209 |
| QsSEP3   | ESNHV-----R-GQVWEGGC--NL-----IGYRQPEVQPLHSGGFFHPLDC       | 217 |
| SiSEP1   | EIV-A-----ENNMQAWGGGE--QS-----LNVGQQ-----HPQSQGFQPLDC     | 211 |
| AtSEP3   | DGYQI-----PLQLNPQVEVDH-YG-----R-HHMQ-----QHSQGFQPLDC      | 215 |
| SiSEP3   | ESV-A-----GFLPLRLCIVGDDH-HQ-----L'HQQN-R-----LPNTGFFQPLGL | 211 |
| PtSEP1   | EIS-A-----RNSLRPSWEGDDQ-QN-----HSGHQA-----QSQ--GLFQALEC   | 210 |
| VvSEP3   | EIS-V-----KNHLQLSWESGE--QS-----HSGHQA-----QSQ--GLFQALEC   | 210 |
| AtrSEP3  | AA-----GGNDSTGH--Q-----HGYRQA-----QAQDNFFHPLDC            | 204 |
| CuSEP1   | EIN-A-----KTQLRPSWEGGE--QQ-----LGYNPQA-----QTQ-G-LFQPTC   | 209 |
| PtSEP1   | ESN-T-----RPLRLGWEAEDH-IN-----ISYRLPT-----QSQ-GLIFQPLGG   | 211 |
| CsaSEP2  | ESNIA-----QVPLRQAWEGG--QS-----IQYQQLPP-----QSE-G-FFQPLGG  | 119 |
| CmSEP2   | ESNIA-----QVPLRQAWEGG--QS-----IQYQQLPP-----QSE-G-FFQPLGG  | 210 |

**Figure S2 – Alignment of ABCDE-like amino acid sequences.** Boxes indicate the conserved domains: MADS-domain (blue), I domain (green), and K domain (red). **A)** A-class proteins; **B)** B-class proteins; **C)** C and D-class proteins **D)** E-class proteins



|          |        |                                                                            |                |             |
|----------|--------|----------------------------------------------------------------------------|----------------|-------------|
| <b>A</b> | AtPI   | ----MMMRDHDGQFGYRVQPIQPNLQEKIMSLVID                                        | PI motif       |             |
|          | QsPI   | YQQRVREYNSQMPFAFRVQPIQPNLQERM-----                                         |                |             |
|          | CmPI   | YQLRVREYNSQMPFAFRVQPIQPNLQERM-----                                         |                |             |
|          | CsaPI  | YQLRVREYNSQMPFAFRVQPIQPNLQERM-----                                         |                |             |
|          |        |                                                                            |                |             |
| <b>B</b> | AtAP3  | DNGGDYDSVLGYQIEGSRAYALRFHQNHHPNHLHAPSASDIITFHLLE                           | euAP3 motif    |             |
|          | QsAP3  | DNGGDYGAVIGCSNGDPHIFALRLRPRQPNF-----HSGAGSOLTTYTLLE                        |                |             |
|          | CmAP3  | DN-GDYGAVIGCSNGDPHMFALRLRPRQPNF-----HSGAGSOLTTYTLLE                        |                |             |
|          | CsaAP3 | DN-GDYGAVIGCSNGDPHIFALRLRPRQSNF-----HSGAGSOLTTYTLLE                        |                |             |
|          |        |                                                                            |                |             |
| <b>C</b> | SlTM6  | ENEGHYHSAVAFANGVHNLYAFRLQPLHPNLQNEGGFGSRDLRLS                              | PaleoAP3 motif |             |
|          | QsTM6  | DNEGDESTIALTNGASNLYAFRLHSSHLDLHHAGGFETEDLRLA                               |                |             |
|          | CmTM6  | DNEGDESTIALTNGASNLYAFRLHSSHLDLHHAGGFESDLRLA                                |                |             |
|          | CsaTM6 | DNEGDESTIALTNGASNLYAFRLHSSHLDLHHAGGFESDLRLA                                |                |             |
|          |        |                                                                            |                |             |
| <b>D</b> | AtAG   | QILRAKIAENERNNPSISLMP-GGSNYEQLMPPPTQSQPFDSRNYFQVAALQFNNHHYS                | AG motif I     | AG motif II |
|          | CmAG   | QLLRAKIAENERNQQLNVMPAGGGSYELM-----QTQQYDSRNFFQVNALQFN-HQYP                 |                |             |
|          | QsAG   | QLLRAKIAENERNQQLNVMPAGGGNYEFM-----QTQQYDSRNFFQVNALQFN-HQYP                 |                |             |
|          | CsaAG  | QLLRAKIAENERNQQLNVMPAGGGNYELM-----QTQQYDSRNFFQVNALQFN-HQYP                 |                |             |
|          |        |                                                                            |                |             |
| <b>E</b> | AtSHP  | QHNNMYLRAKIAEGARLNPQQESSVIQGTTVYESGVSSHDSQHYH                              | AG motif I     | AG motif II |
|          | QsSHP  | QNENNYLRAKIAENEX--AQQQGNTNMPETVYES-----VSSQTYDRNYLPANLLESNNHHYSR-----      |                |             |
|          | CsaSHP | QNENNYLRAKIAENER--AQQEQTNTNMPETVYES-----VSSQTYDRNYLPANLLESNNHHYSRQDQTALQLV |                |             |
|          | CmSHP  | QNENNYLRAKIAENER--AQQEQTNTNMPETVYES-----VSSQTYDRNYLPANLLESNNHHYSRQDQTALQLV |                |             |
|          |        |                                                                            |                |             |

**Figure S3** – Motif similarity in B and C MADS-box proteins between *C. sativa* and *A.thaliana*, *Q. suber* and *C. mollissima* (or *S. lycopersicum* in the case of TM6). **A)** PI-like proteins; **B)** AP3-like proteins; **C)** TM6-like proteins; **D)** AG-like proteins; **E)** SHP-like proteins
